1 **Characterizing the body morphology of the first metacarpal in the Homininae**  
2 **using 3D geometric morphometrics**

3

4 Jonathan Morley<sup>1</sup>, Ana Bucchi<sup>2,3</sup>, Carlos Lorenzo<sup>4,3</sup>, Thomas A. Püschel<sup>5,1\*</sup>

5

6 <sup>1</sup>Institute of Cognitive and Evolutionary Anthropology, School of Anthropology,  
7 University of Oxford, 64 Banbury Road, OX2 6PN, Oxford, United Kingdom.

8 <sup>2</sup>Centro de Investigación en Odontología Legal y Forense (CIO), Universidad de La  
9 Frontera, Uruguay 1836, Temuco, Chile.

10 <sup>3</sup>Institut Català de Paleoecologia Humana i Evolució Social (IPHES), Zona  
11 Educacional 4, Campus Sescelades URV (Edifici W3), 43007 Tarragona, Spain.

12 <sup>4</sup> Àrea de Prehistòria, Universitat Rovira i Virgili (URV), Avinguda de Catalunya 35,  
13 43002 Tarragona, Spain.

14 <sup>5</sup>Ecology and Evolutionary Biology Division, School of Biological Sciences, University  
15 of Reading, Philip Lyle building, RG6 6BX, Reading, United Kingdom.

16

17

18 \*Corresponding author:

19 Thomas A. Püschel

20 E-mail: [thomas.puschelrouliez@anthro.ox.ac.uk](mailto:thomas.puschelrouliez@anthro.ox.ac.uk)

21 Phone: -

22

23 Running title: Characterizing MC1's morphology in the Homininae

24

25

26 **Abstract**

27 Objectives: The morphological characteristics of the thumb are of particular interest  
28 due to its fundamental role in enhanced manipulation. Despite its possible importance  
29 regarding this issue, the body of the first metacarpal (MC1) has not been fully  
30 characterized using morphometrics. This could provide further insights into its  
31 anatomy, as well as its relationship with manipulative capabilities. Hence, this study  
32 quantifies the shape of the MC1's body in the extant Homininae and some fossil  
33 hominins to provide a better characterization of its morphology.

34 Materials and methods: The sample includes MC1s of modern humans (n=42), gorillas  
35 (n=27) and chimpanzees (n=30), as well as *Homo neanderthalensis*, *Homo naledi* and  
36 *Australopithecus sediba*. 3D geometric morphometrics were used to quantify the  
37 shape of MC1's body.

38 Results: The results show a clear distinction among the three extant genera. *H.*  
39 *neanderthalensis* mostly falls within the modern human range of variation. *H. naledi*  
40 varies slightly from modern humans, although also showing some unique trait  
41 combination, whereas *A. sediba* varies to an even greater extent. When classified  
42 using a discriminant analysis, the three fossils are categorized within the *Homo* group.

43 Conclusion: The modern human MC1 is characterized by a distinct suite of traits, not  
44 present to the same extent in the great apes, that are consistent with an ability to use  
45 forceful precision grip. This morphology was also found to align very closely with that  
46 of *H. neanderthalensis*. *H. naledi* shows a number of human-like adaptations, whilst  
47 *A. sediba* presents a mix of both derived and more primitive traits.

48

49 **Keywords:** MC1; 3D geometric morphometrics; Semi-landmarks; Hominins; African  
50 apes

## 51 **1 Introduction**

52 Thumbs in modern humans are different from those of African apes (e.g., Almécija,  
53 Smaers, & Jungers, 2015; Dunmore, Bardo, Skinner, & Kivell, 2020; Galletta,  
54 Stephens, Bardo, Kivell, & Marchi, 2019; Green & Gordon, 2008; Stephens et al.,  
55 2016; Susman, 1994). Modern humans have a relatively broader shaft for the first  
56 metacarpal (MC1) and a higher thumb-to-digit ratio than the African apes, especially  
57 chimpanzees (Almécija et al., 2015; Feix, Kivell, Pouydebat, & Dollar, 2015; Green &  
58 Gordon, 2008; Rolian & Gordon, 2013). Additionally, compared to our closest living  
59 relatives we possess thenar musculature that is relatively more developed than the  
60 other hand muscles (Tuttle, 1969), a condition that has been inferred from the hominin  
61 fossil record by observing how strong or flawed their bony attachments are (Bush,  
62 Lovejoy, Johanson, & Coppens, 1982; Karakostis, Hotz, Turloukis, & Harvati, 2018;  
63 Kivell, 2015; Kivell, Kibii, Churchill, Schmid, & Berger, 2011; Maki & Trinkaus, 2011;  
64 Richmond et al., 2020). Modern humans also differ from the extant African apes in the  
65 relative size of the epicondyles and degree of curvature of the proximal (Marchi,  
66 Proctor, Huston, Nicholas, & Fischer, 2017; Marzke et al., 2010) and distal joint  
67 surfaces of the MC1 (Galletta et al., 2019).

68 These anatomical traits that set apart humans from the African apes have presumably  
69 evolved to cope with the different functional demands experienced by these taxa (i.e.,  
70 manipulation vs. locomotion) (Almécija, Moyà-Solà, & Alba, 2010; Matarazzo, 2015;  
71 Püschel, Marcé-Nogué, Chamberlain, Yoxall, & Sellers, 2020; Richmond & Strait,  
72 2000; Tsegai et al., 2013). The more robust human thumb and greater degree of  
73 curvature of the joint surfaces allow our species to produce greater force and to better  
74 withstand the stresses of tool-related behaviors (Galletta et al., 2019; Key & Dunmore,  
75 2018; Key & Dunmore, 2015; Rolian, Lieberman, & Zermeno, 2011). On the other

76 hand, the thumb of chimpanzees is slender and shorter relative to the other fingers,  
77 presumably a suspensory-related adaptation (Almécija et al., 2015; Feix et al., 2015),  
78 and although the thumb length and breadth in gorillas differs less from humans than  
79 chimpanzees (Almécija et al., 2015; Feix et al., 2015; Green & Gordon, 2008), it does  
80 show a reduced thenar musculature, which is the primitive condition in the hominidae  
81 (Diogo, Richmond, & Wood, 2012; Tocheri, Orr, Jacofsky, & Marzke, 2008; Tuttle,  
82 1969).

83 Even though using skeletal proxies of the MC1 to infer the degree of dexterity is  
84 common practice (e.g., Dunmore et al., 2020; Feix et al., 2015; Maki & Trinkaus,  
85 2011), the continuous nature of these traits makes it difficult to quantify how different  
86 hominines are with respect to each other, which consequently complicates the  
87 correlation of these proxies with different functional capabilities. Building upon this  
88 problem, recent research on the MC1 has been conducted using three-dimensional  
89 geometric morphometric (3DGM) techniques, focusing on the joint surfaces in apes  
90 and fossil hominins (Galletta et al., 2019; Marchi et al., 2017). Marchi et al. (2017)  
91 propose that hominins (modern humans, *Paranthropus robustus*/early *Homo* SK84  
92 and *Au. africanus*) are significantly different from non-human hominids in that they  
93 possess a radioulnar and dorsovolar flatter proximal joint, a less projecting volar beak  
94 and a radially extended surface. This would allow our species to better abduct and to  
95 accommodate larger axial loads when pinching objects (Marchi et al., 2017; Marzke  
96 et al., 2010). Humans also vary from apes in having a larger and flatter distal articular  
97 surface in a radioulnar direction and a radial palmar condyle that is larger and more  
98 palmarly projecting than the ulnar one, which would contribute to the stabilization of  
99 the joint during forceful precision grip (Galletta et al., 2019). Neanderthals and *H.*  
100 *naledi* are located within the modern human range of variation for these traits, whereas

101 the other analyzed hominins (*Au. africanus*, *Paranthropus robustus*/early *Homo* SK84  
102 and *Au. sediba*) occupy a position between modern humans and the great apes.

103 In spite of its possible importance, the body of the MC1 has not been fully analyzed  
104 using 3DGM to assess its possible relevance when correlating its anatomy with  
105 different manipulative capabilities. In addition, fossils are often fragmentary and  
106 epiphyses in the fossil record are often damaged (see for e.g., *H. naledi*'s U.W. 101-  
107 401 MC1) or abraded (see for e.g., *H. naledi*'s U.W. 101-1641 MC1). Therefore, a  
108 method focused only on the MC1 shaft might be particularly useful. Consequently, this  
109 study focuses on the body morphology of the MC1 using 3DGM. The objective was to  
110 provide further information that could contribute towards a better characterization of  
111 the MC1's anatomy, as well as to provide further insights towards the identification of  
112 structures in extant species that may be associated with human-like manipulative  
113 capabilities and to assess if similar morphologies are present in fossil hominins.

114 Even though the great apes use their hand for manipulatory activities, their  
115 morphology is likely more related to their locomotion (i.e., knuckle-walking and  
116 arborealism) (Almécija, Moyà-Solà, & Alba, 2010; Matarazzo, 2015; Püschel et al.,  
117 2020; Richmond & Strait, 2000; Tsegai et al., 2013). It is therefore expected that the  
118 selective pressures associated with locomotor behavior in chimpanzees and gorillas  
119 will result in an MC1 morphology that varies significantly from that of modern humans.  
120 We also expect gorillas to be closer to humans rather than chimpanzees, as previous  
121 research has indicated that their metacarpals are broader and the thumb-fingers ratio  
122 less different from humans compared with those of chimpanzees (Almécija et al.,  
123 2015; Green & Gordon, 2008; Rolian & Gordon, 2013). Additionally, we also expect  
124 the MC1's shaft morphology of *Au. sediba* to show an intermediate morphology

125 located between the range of variation of modern humans and that of the great apes,  
126 as previous studies indicate that the hand of this species displays a mosaic anatomy  
127 of primitive and derived traits (Kivell et al., 2011). *Au. sediba* MC1 has gracile  
128 attachments for the opponens pollicis and first dorsal interosseus muscles, but it also  
129 possesses a long thumb relative to the fingers, which is close to the modern human  
130 configuration (Kivell et al., 2011). On the other hand, we expect that the Neanderthal  
131 and *H. naledi* specimens will show a morphology similar to that of modern humans as  
132 previous analyses have suggested that they exhibit similar attachment sites of the  
133 thenar musculature, as well as a relatively similar thumb length (Feix et al., 2015;  
134 Karakostis, Hotz, Tournaloukis, & Harvati, 2018; Kivell, 2015; Maki & Trinkaus, 2011).  
135 Consequently, we tested the following hypothesis:

136 **Hypothesis 1:** MC1's morphology significantly differs between modern humans and  
137 the extant African ape species. The modern human MC1's shaft is expected to be  
138 more similar to that of gorillas rather than chimpanzees due to its broader shaft, as  
139 well as relative length and breadth.

140 **Hypothesis 2:** *H. naledi* and *H. neanderthalensis* specimens exhibit an MC1  
141 morphology more similar to modern humans than other great apes, while *Au. sediba*  
142 shows an intermediate morphology between the African apes and modern humans.

## 143 **2 Material and methods**

### 144 **2.1 Sample**

145 The extant sample used in this study includes MC1s of modern humans (*Homo*  
146 *sapiens*; n=42), chimpanzees (*Pan troglodytes*; n=30), and gorillas (*Gorilla gorilla* and  
147 *Gorilla beringei*; n=27) (Table S1). The human MC1s came from a medieval cemetery  
148 in Burgos, Spain (Casillas Garcia & Alvarez, 2005) and the surface models were

149 obtained using a Breuckmann SmartSCAN structured light scanner. The non-human  
150 sample came from museum collections and are of different origins (i.e., wild-shot,  
151 captivity and unknown origin). There were no significant shape differences between  
152 wild vs. captive specimens, nor between the two gorilla species included in this study,  
153 hence we felt confident to pool the extant specimens at the genus level (see S2 for  
154 further details). The MC1 surface models were collected using photogrammetry as  
155 described in Bucchi et al. (2020a). The 3D models from the surface scanner were  
156 obtained using a resolution of 0.125 mm, while most of the photogrammetric models  
157 ranged from 400,000 to 600,000 triangles of uniform size. A previous study that  
158 applied the same surface scan and photogrammetry protocols to digitize hand bones  
159 found that both types of 3D models are of comparable quality (Bucchi, Luengo, Bove,  
160 & Lorenzo, 2020b). Additionally, we carried out a comparison a sub-sample of 30  
161 specimens that were digitized using both technologies (i.e., photogrammetry and  
162 structured-light scanning) and we found that differences between models obtained  
163 using the different digitalization technologies are extremely small (less than ~0.17 mm  
164 on average). Hence, we are confident that it is possible to combine these kinds of 3D  
165 models in our analyses. Further details about these 3D model comparisons can be  
166 found in S3. Only adult individuals that show no evident pathologies were included in  
167 the study and right MC1s were preferred (although left MC1s were reflected when their  
168 antimeres was not present as indicated in S1).

169

170 The fossil sample includes the right metacarpal from a *Homo neanderthalensis*, the  
171 right metacarpal from a *Homo naledi* and the left metacarpal from an *Australopithecus*  
172 *sediba*. The *H. neanderthalensis* sample (La Ferrassie 1) was found in La Ferrassie  
173 archaeological site in Savignac-de-Miremont, France. This skeleton was discovered

174 in 1909 and is estimated to be 70–50,000 years old (Guérin et al., 2015). The *Homo*  
175 *naledi* sample (U.W. 101-1321) was recovered in 2013 from the Rising Star cave  
176 system in South Africa and has been dated to around 236-335 ka years ago (Dirks et  
177 al., 2017). The *A. sediba* sample (MH2) was taken from the near complete wrist and  
178 hand of an adult female (Malapa Hominin 2) discovered in Malapa, South Africa, which  
179 has been dated around 1.98 million years (Berger et al., 2010; Pickering et al., 2011).  
180 The latter fossils were downloaded from Morphosource  
181 <https://www.morphosource.org/>, whereas the Neanderthal was obtained from a cast  
182 housed at the Catalan Institute of Human Paleoecology and Social Evolution (IPHES).

183

## 184 2.2. 3DGM

185 3D landmarks were collected using the software Landmark Editor 3.6 (Wiley et al.,  
186 2005) to quantify the MC1's morphology, including relevant functional proxies as the  
187 epicondyles, the shaft curvature and the attachments sites for the opponens pollicis,  
188 abductor pollicis longus and first dorsal interosseus muscles. These attachments sites  
189 are in the MC1 at the lateral margin, body at the ulnar side of the bone and the base  
190 at the radial side, respectively, and are the same for the three genera under study  
191 (Diogo et al., 2011; 2013). Eight curves comprising 20 equidistant landmarks each  
192 were placed at pre-defined points on the MC1 (Figure 1; S4). These landmarks were  
193 chosen to provide a good representation of the shaft of the bone.

194

195 We assessed whether sufficient number of landmarks have been sampled to  
196 characterize MC1's shape variation by using the `lasec()` function of the 'LaMBDA'  
197 0.1.0.9000 R package (Watanabe 2017) (further details about this procedure can be  
198 found in S5). The first and last landmarks from each one of the eight curves were



199 treated as fixed (i.e., 16 fixed landmarks), whereas all the rest of them (i.e., 144  
200 landmarks) were considered as semi-landmarks. A generalized Procrustes  
201 superimposition was performed on the landmark data to remove differences due to  
202 scale, translation, and rotation in order to obtain shape variables (Bookstein, 1991).  
203 This procedure was done using the `gpagen()` function available as part of the  
204 'geomorph' R package 3.3.1 (Adams, Collyer, & Kaliontzopoulou, 2020). The semi-  
205 landmarks were slid on the MC1's surface by minimizing bending energy (Bookstein,  
206 1997; Gunz, Mitteroecker, & Bookstein, 2005). This is an iterative process that works  
207 by allowing the semi-landmarks to slide along the surface to remove the effects of  
208 arbitrary spacing by optimizing the location of the semi-landmarks with respect to the  
209 consensus shape configuration (Gunz & Mitteroecker, 2013). There are two main  
210 criteria to slide semi-landmarks (i.e., bending energy and Procrustes distance) which  
211 have been shown to provide relatively similar results when carrying out inter-specific  
212 comparisons (Perez, Bernal, & Gonzalez, 2006). We preferred to use bending energy  
213 as this sliding criterion allows all semi-landmarks to slide together and being influenced  
214 by the other available landmarks and semi-landmarks, whereas when Procrustes  
215 distance is used, each semi-landmark slides individually and, apart from the common  
216 Procrustes superimposition (Gunz & Mitteroecker, 2013). All the Procrustes residuals  
217 analyzed in this work are available in S6.

218

219 These obtained shape variables were then used in a principal component analysis  
220 (PCA) to summarize shape variation. The PCA was carried out using the `gm.pcomp()`  
221 function of the 'geomorph' R package 3.3.1 (Adams, Collyer, & Kaliontzopoulou,  
222 2020). To visualize shape differences warped models representing the shape changes  
223 along the first three principal components (PCs) were generated. The models closest

224 to the mean shape (i.e., lowest Procrustes distance to the multivariate consensus) was  
225 warped to match the multivariate mean using the thin plate spline method. Then, the  
226 obtained average model was warped to display the variation along the three plotted  
227 PC axes (mag = 1).

228

229 The dataset of extant hominoids was then grouped by genus and the Procrustes  
230 variance of observations in each group (i.e., the mean squared Procrustes distance of  
231 each specimen from the mean shape of the respective group) was computed as a  
232 simple measure to assess morphological disparity within each one (Drake &  
233 Klingenberg, 2010; Zelditch, Swiderski, & Sheets, 2012a). Procrustes variance was  
234 applied here as way to evaluate intra-genus variation, and absolute differences in  
235 Procrustes variances were computed to test differences in morphological disparity  
236 among groups (these differences statistically evaluated through permutation [999  
237 rounds]). This procedure was carried out using the `morphol.disparity()` function  
238 available as part of the 'geomorph' R package 3.3.1 (Adams, Collyer, &  
239 Kaliontzopoulou, 2020).

240

241 A multi-group linear discriminant analysis (LDA) (also known as canonical variate  
242 analysis [CVA]) was run to test if it was possible to distinguish among the three genera.  
243 This procedure maximizes the separation between groups. Since our number of  
244 variables (i.e., landmarks and semi-landmarks) exceeded the number of analyzed  
245 specimens, we carried out this analysis using the principal components (PCs) that  
246 accounted for 90% of the sample variance to reduce the dimensionality of the dataset.  
247 The LDA was carried out using the `lda()` function of the 'MASS' 7.3-51.6 R package  
248 (Venables & Ripley, 2002). Performance was calculated using the confusion matrix

249 from which the overall classification accuracy was computed, as well as the Cohen's  
250 Kappa statistic (Püschel, Marcé-Nogué, Gladman, et al., 2020; Püschel, Marcé-  
251 Nogué, Gladman, Bobe, & Sellers, 2018). The complete dataset was resampled using  
252 a 'leave-one-subject-out' cross-validation, as a way to assess classification  
253 performance (Kuhn & Johnson, 2013). In addition, by using the obtained discriminant  
254 function we classified the fossil sample into the three extant genera as way to assess  
255 morphological affinities. Pairwise PERMANOVA tests with Bonferroni corrections for  
256 multiple comparisons were performed to assess shape differences among the three  
257 extant genera using the PCs that accounted for 90% of the sample variance. Euclidean  
258 distances computed using the PCs that accounted for ~ 90% of the total variance of  
259 the sample were selected as dissimilarity index. This procedure was performed using  
260 the `adonis()` function of the 'vegan' 2.5-7 R package (Oksanen et al., 2020).

261  
262 Additionally, we also decided to compute a curvature metric to better assess how  
263 curve the MC1's shaft is along both its dorsal and palmar aspects (i.e., semi-landmark  
264 curves C1 and C2 in Fig. 1), as well as to facilitate the morphological description of  
265 the morphometric results. Hence, Menger (1930) curvatures were calculated for each  
266 one of the semi-landmark points of the two curves (i.e., C1 for the dorsal side and C2  
267 for the palmar aspect) using a custom-written script in R. The Menger curvature of  
268 three points in n-dimensional Euclidean space  $\mathbb{R}^n$  is defined as the reciprocal of the  
269 radius of the circle that passes through the three points (Menger, 1930). Menger  
270 curvature was calculated locally for each semi-landmark point along the curve,  
271 excepting the first and last fixed landmarks, as it is not possible to compute a curvature  
272 value at the starting and ending points of each one of the curves. This resulted in 18  
273 curvature values for each one of the semi-landmark curves (i.e., C1 and C2). The

274 curvature values of each one of the curves were summed to obtain a measurement of  
275 the overall curvature of C1 and C2 (higher values would correspond to more  
276 pronounced curvatures). This procedure was performed on the six 3D models that  
277 were warped to represent the variation along the first three PC axes.

278

279 In addition, as measurement error (ME) has a critical importance when performing  
280 morphometric analyses, a sub-sample of 33 randomly selected MC1s were digitized  
281 twice and compared via a Procrustes ANOVA to assess ME (Klingenberg & McIntyre,  
282 1998). We also carried out a regression of shape variables on centroid size using the  
283 whole sample to assess allometric influence. Both procedures were carried out using  
284 the `procD.lm()` function available as part of the 'geomorph' R package 3.3.1 (Adams,  
285 Collyer, & Kaliontzopoulou, 2020). All the mentioned morphometric and statistical  
286 analyses were carried out in R 4.0.2 (R Core Team, 2020).

287

### 288 **3 Results**

#### 289 3.1 Measurement error and allometric influence

290 The Procrustes ANOVA used to measure intra-observer error in the sub-sample  
291 showed that the mean square for individual variation far exceeded ME, so this type of  
292 error was negligible (see S7 for further details). ME was also quantified as shape  
293 repeatability using a ratio of the among-individual to the sum of the among-individual  
294 and measurement error components as explained in Zelditch, Swiderski, & Sheets  
295 (2012b). Shape repeatability was 0.95, which indicates a minimal ~5% error.  
296 Regarding allometric influence, we found that centroid size only accounted for ~2.7%  
297 of MC1 shape variation. This means that, for the goals of the present study, we can  
298 exclude size as a particularly significant factor contributing to potential inter-generic

299 variation in shape. Hence, we decided that it was not necessary to ‘correct’ for  
300 allometric effects as ~97.3% of the shape variation is not explained by size (further  
301 details about this regression are available in S8).

302

### 303 3.2 Principal component analysis

304 The PCA performed using the shape variables returned 102 PCs. The first 22 PCs  
305 accounted for ~ 90% of the total variance of the sample, hence offering a reasonable  
306 estimate of the total amount of MC1’s shape variation, which were then used in the  
307 LDA and pairwise PERMANOVA tests. The first three PCs in the PCA account for ~  
308 58% of the total variance and display a relatively clear separation among the extant  
309 African ape genera (Fig. 2a) (PCA biplots for PC1 vs. PC2, PC1 vs. PC3 and PC2 vs.  
310 PC3 are also available in S9). PC1 explains 41.44%, PC2 11.18% and PC3 5.82% of  
311 total variance, respectively (Fig. 2). To visualize shape differences, the warped 3D  
312 models corresponding to the highest and lowest values at each extreme of the first  
313 three PCs were plotted alongside the violin plots. A violin plot is a combination of a  
314 boxplot and a kernel density plot that is rotated and placed on each side to show the  
315 distribution shape of the data (Adler & Kelly, 2020). In addition, six movies showing  
316 the shape changes along the three first PCs axes are also provided in S10. These  
317 warped models are also displayed in Figure 3 to facilitate the morphological  
318 interpretation of our results. Anatomical descriptions associated with each one of the  
319 positive and negative extremes of the first three PCs are also provided in the same  
320 figure.

321

322 Violin plots of PC1 (Fig. 2b) show a notable difference between gorillas and humans  
323 vs. chimpanzees. PC1 separates the mediolaterally narrower MC1 shafts of *Pan* from

324 the broad MC1 shafts of *H. sapiens* and *Gorilla*. These two genera exhibit the highest  
325 PC1 scores, which correspond to a more developed muscular attachments, straighter  
326 dorsal aspect of the body, and overall robust shaft with broader distal-most and  
327 proximal-most portions of the shaft (i.e., MC1's body and not the articular surfaces  
328 which were not morphometrically characterized in this study) (Fig. 3). Chimpanzees  
329 show the lowest PC1 scores, representing a more gracile shaft, a more pronounced  
330 antero-posterior curvature of the shaft, less marked muscle attachments with narrower  
331 distal-most and proximal-most portions of the body and smaller radial and ulnar  
332 epicondyles (Fig. 3). *H. neanderthalensis* falls within the human and gorilla  
333 distributions and is distinct completely from the chimpanzees. *H naledi* falls within the  
334 gorilla distribution, whilst *A. sediba* is characterized by a lower PC1 score and aligns  
335 closer to the *Pan* distribution. None of the analyzed fossils fall within any of the  
336 interquartile ranges (IQR) (i.e., black bars in Fig. 2b-d) of any of the extant genera.

337

338 Violin plots of PC2 (Fig. 2c) shows distinct variation among the extant genera, with a  
339 morphological continuum ranging from *Gorilla* (lower PC2 values), *Pan* (central PC2  
340 values) and extant *Homo* (higher PC2 scores). PC2 seems to summarize the relative  
341 breadth of the middle and distal shaft with respect to the relative size of the proximal  
342 shaft and base. The *Gorilla* sample has the lowest PC2 scores, a more radioulnar and  
343 dorsovolar rounded ends of the shaft, and a medial epicondyle which is more distal  
344 relative to the lateral epicondyle (Fig.3). The modern human distribution shows the  
345 highest PC2 scores, representing flatter distal-most and proximal-most portions of the  
346 body, as well as larger area at the place of origin of the radial palmar condyles at the  
347 distal end of the analyzed area (i.e., the shaft). The chimpanzee sample lies in  
348 between the gorilla and modern human samples displaying an intermediate

349 morphology. In a similar fashion as chimpanzees, the three fossils are located at  
350 intermediate positions in PC2 distribution. *H. neanderthalensis* and *H. naledi* display  
351 PC2 scores that are within the *Pan* IQR, whilst *A. sediba* has higher values.

352

353 Violin plots of PC3 (Fig. 2d) show a similar distribution of PC scores for the three extant  
354 genera. From a morphological perspective, lower values correspond to more gracile  
355 MC1s while higher scores are associated with more robust morphologies displaying  
356 more surface for muscular attachments (for the opponens pollicis, first dorsal  
357 interosseous and abductor pollicis longus muscles). *H. naledi* and *A. sediba* show  
358 values which are within the extant genera distributions, but outside their IQR and at  
359 opposite extremes of the axis. *H. neanderthalensis* lies outside the distribution of any  
360 of the extant genera, probably due to its particularly robust morphology and associated  
361 marked muscular insertion areas, in particular a marked lateral flange for the  
362 opponens pollicis.

363

### 364 3.3 Morphological disparity

365 The obtained results show that three extant genera show a similar magnitude of  
366 disparity. Nevertheless, gorillas exhibit a higher Procrustes variance as compared to  
367 modern humans and chimpanzees (Table 1a). Gorillas are significantly different to  
368 modern humans, and chimpanzees when comparing absolute variance differences,  
369 whilst modern human do not significantly differ from chimpanzees (Table 1b).

370

### 371 3.4 Linear discriminant analysis

372 The LDA model using the first 22 PCs clearly distinguishes among the three extant  
373 genera, displaying an outstanding performance with excellent classification results  
374 after cross-validation (Accuracy: 0.97; Cohen's Kappa: 0.95; Fig. 4; Table 2). When

375 using the obtained discriminant function to classify the fossils into the extant categories  
376 (as a way of assessing morphological affinities) (Table 3), the three of them were  
377 classified into the *Homo* category, even though only *H. neanderthalensis* was located  
378 within the 95% confidence interval of the modern humans (Fig. 4). The posterior  
379 probabilities were extremely close to 1 for *H. naledi* and *H. neanderthalensis*, hence  
380 indicating that, in spite of their differences, their morphology is closer to that of modern  
381 humans. *A. sediba* was also classified within the *Homo* category (posterior probability:  
382 63%) but this specimen also showed non-trivial posterior probabilities classifying it  
383 within the *Gorilla* category (posterior probability: 29%) or as a member of the *Pan*  
384 group (posterior probability: 7%). There were significant differences among all extant  
385 genera when analyzing the 22 PCs from the PCA carried out using the shape variables  
386 (Table 4).

387

### 388 3.5 Curvature

389 Table 5 provides the summed Menger curvature values for the six 3D models that  
390 were warped to represent the variation along the first three PC axes. These values  
391 were computed for both the dorsal (C1) and palmar (C2) sides of the MC1's shaft and  
392 represent overall curvature. As expected, the palmar side of the shaft (C2) is more  
393 curved than its dorsal counterpart (C1). This means that the palmar curvature (C2)  
394 values are always higher as compared to the dorsal ones (C1) for all analyzed PCs.  
395 Overall, the shapes associated with the maximum values for each one of the three  
396 PCs corresponded to straighter shafts along the palmar side. In addition, the palmar  
397 curvature value (C2) for the minimum scores along PC1 correspond to the highest  
398 curvature (i.e., C2 curvature value for PC1 min; Table 5). The region of the  
399 morphospace that corresponds to this shape is occupied by the chimpanzees (Fig.



400 2b). In summary, the shapes associated with modern humans and gorillas are  
401 straighter, whereas the shapes that describe chimpanzees exhibit a more pronounced  
402 curvature along the palmar side.

403

#### 404 **4 Discussion**

405

406 The first hypothesis was that the shape of the human MC1 would differ significantly  
407 from that of *Pan* and *Gorilla*, due to the variation in their manipulative capabilities and  
408 locomotive behaviors, and that *Gorilla* would show more morphological affinity with  
409 humans than chimpanzees. Overall, these analyses provide support for this  
410 hypothesis, confirming that there is indeed significant morphological variation between  
411 the extant great apes. We also found clear differences between chimpanzees and  
412 gorillas, with gorillas closer (i.e., more similar) to humans than to chimpanzees in PC1.  
413 This is due to their broader and more robust MC1s of gorillas and humans (i.e.,  
414 broader shafts and expanded ulnar and radial epicondyles), as compared to the  
415 slender and more curved MC1s of chimpanzees (Table 5). The second hypothesis  
416 was that fossil hominin species *H. naledi* and *H. neanderthalensis* would exhibit an MC1  
417 morphology more similar to humans than other great apes and *Au. sediba* an  
418 intermediate morphology between the African apes and humans. The results also  
419 support this hypothesis, as observed in the PCA and LDA plots (Figs. 2a and 3).  
420 However, it is important to note that even though the three fossils are more similar to  
421 the modern humans, they also display some distinct features, different from those  
422 which would typically be expected in extant *Homo*.

423

#### 424 4.1 Hominin MC1 shape

425

426 The 3DGM data indicate that there is a distinctive suite of morphological traits that  
427 distinguish humans from chimpanzees and gorillas (Fig 3.). The main distinguishing  
428 traits are a straighter and more robust shaft (Fig. 2b and 3; Table 5) accompanied by  
429 larger radial and ulnar epicondyles and flatter distal and proximal ends of the body  
430 (Fig. 2c and 3). It is important to note that African apes are not a homogeneous group.  
431 For instance, gorillas show morphological affinities with humans relative to the shaft  
432 robusticity, although with a more proximo-distally curved shaft along its palmar side  
433 (Table 5), and more rounded distal-most and proximal-most portions of the MC1's  
434 body. The PCA shows that chimpanzees are characterized by a slender and more  
435 gracile MC1, and this trait makes chimpanzees the most distinctive genus amongst  
436 extant taxa (Fig. 2b and 3). Chimpanzees are also characterized by an intermediate  
437 curvature of the radioulnar and dorsovolar ends of the shaft (Fig. 2c and 3).  
438 Interestingly, we found that chimpanzees display a more proximo-distally curved MC1  
439 shaft compared with gorillas and humans (Fig. 3; Table 5). To our knowledge, this  
440 property has been only studied in phalanges 2-5, with those of chimpanzees being  
441 more curved than those of gorillas and humans (Stern, Jungers, & Susman, 1995;  
442 Susman, 1979). This curvature degree at the shaft has been usually interpreted as an  
443 adaptation for suspension and overall arboreal locomotion in digits 2-5 (Rein, 2011).  
444 As for the thumb, there is preliminary data that seems to indicate that it is routinely  
445 recruited during suspension in orangutans (McClure Phillips, Vogel & Tocheri, 2012),  
446 yet its role has not been fully studied in chimpanzees. Consequently, it is not possible  
447 associate the MC1's curvature observed in chimpanzees with the suspensory  
448 behaviors of this species.

449

450 As for the fossils studied here, results indicate that they all show a unique repertoire  
451 of morphological traits, different from those of extant genera. The general scientific  
452 consensus in recent years is that *H. neanderthalensis* had a hand morphology that  
453 was very similar to that of humans (Karakostis, Hotz, Scherf, Wahl, & Harvati, 2017;  
454 Karakostis et al., 2018; Niewoehner, 2001, 2006; Tocheri et al., 2008; Trinkaus &  
455 Villemeur, 1991). Our obtained results align well with this consensus, with the *H.*  
456 *neanderthalensis* specimen showing several similarities with the modern humans. The  
457 described morphology is one of a flatter (PC2) and broader (PC1) distal-most portion  
458 of the shaft, bigger epicondyles at the distal head (PC1) and a flatter proximal-most  
459 area of the shaft (PC2). However, *H. neanderthalensis* also differs in exhibiting a  
460 particularly robust MC1 with strongly marked muscular insertions, which distinguishes  
461 it from the rest of the sample, particularly along PC3. Neanderthals are known for the  
462 large flanges on their MC1s for the insertion of the opponens pollicis muscle that  
463 results in a waisted appearance of the MC1 in an anterior or posterior view (Maki &  
464 Trinkaus 2011; Trinkaus 1983). This trait also appears, to varying degrees, among  
465 some modern human populations, but rarely to the extent observed in *H.*  
466 *neanderthalensis* (Trinkaus et al. 2014). In our sample, this trait clearly distinguishes  
467 *H. neanderthalensis* from the rest of the analyzed specimens along PC3.

468  
469 Previous reports indicate that the general morphology of the *H. naledi* MC1 aligns  
470 more closely with humans than apes, whilst still possessing a number of more primitive  
471 characteristics than the human MC1 (Kivell et al., 2015; Galletta et al. 2019). In our  
472 results we found that *H. naledi* aligns closer to humans in terms of shaft robusticity  
473 (Fig. 2b) and well-developed crest for the insertion of the opponens pollicis muscle  
474 (PC3) as it was reported by Kivell et al., (2015) and Galletta et al. (2019). However, it

475 is also close to the range of morphological variability of chimpanzees in both PC1 and  
476 PC2, which indicates that the robusticity and curvature of the radioulnar and  
477 dorsovolar ends of the shaft is not similar to what is observed in modern humans. Even  
478 though the LDA robustly classifies *H. naledi* within the *Homo* category, it is worth  
479 mentioning that this specimen occupies a particularly unique position when projected  
480 to the LDA space. This is also observed in its position in the PCA, which seem to  
481 indicate an unusual morphology that can be described as displaying a narrower  
482 proximal end of the body, a relatively broader distal portion of the shaft, as well as  
483 marked attachment sites for the opponens pollicis and dorsal interossei. All these  
484 anatomical attributes contribute to generate the 'pinched' appearance of the palmar  
485 surface of *H. naledi*'s MC1 shaft (Kivell et al. 2015b).

486

487 Previous analysis of *A. sediba*'s hand morphology has found that it possessed several  
488 advanced *Homo*-like features, such as a longer thumb relative to shorter fingers, that  
489 potentially indicate advanced manipulative capabilities, whilst retaining primitive traits,  
490 such as a gracile MC1, similar to those of other australopiths (Kivell et al., 2011;  
491 Galletta et al., 2019). Our analysis showed that, unlike the Neanderthal and *H. naledi*  
492 specimens, *A. sediba* presented a general morphology that is more similar to  
493 chimpanzees than modern humans. *A. sediba* exhibits smaller epicondyles and a  
494 gracile shaft (Fig. 2b), with relatively flatter muscle attachments at the MC1 (Fig. 2d)  
495 than those observed in *Pan*.

496

497 4.2 Functional implications

498

499 Even though our study rigorously addresses the anatomical differences among the  
500 MC1s of extant hominines, any functional interpretations that we can advance are  
501 certainly inferred and not directly derived from our results. Hence, caution is required  
502 when interpreting these functional implications because shape differences could result  
503 from several different factors and not only be the result of different manipulative  
504 capabilities. Overall, our 3DGM results are consistent with previous assessments for  
505 the shaft morphology of the extant African apes and fossils hominins, and thus  
506 provides a morphometric support for the functional interpretations made based upon  
507 those features. The large epicondyles and robust shaft presented by the Neanderthal  
508 MC1 sample may suggest that they performed tool use in a very similar fashion to  
509 modern humans (Karakostis, et al., 2018; Niewoehner, 2001, 2006; Tocheri et al.,  
510 2008; Trinkaus & Villemeur, 1991). Nevertheless, the analyzed *H neanderthalensis*  
511 specimen also shows a classic Neanderthal feature (i.e., the opponens pollicis flange),  
512 which clearly distinguish it from the rest of the sample, particularly along PC3. It has  
513 been mentioned that it difficult to evaluate to what extent this trait may reflect muscle  
514 hypertrophy since the actual insertion area is mostly along the radiopalmar margin  
515 rather than across the palmar flange (Trinkaus, 2016). However, it is worth noticing  
516 that the radial extension of the opponens pollicis flange has been interpreted as  
517 increasing the opponens pollicis rotational moment arm, which suggests a greater  
518 mechanical effectiveness of this muscle in this species (Maki & Trinkaus 2011). *H.*  
519 *naledi* MC1's anatomy suggests that this species was probably able to perform a  
520 certain degree of advanced manipulation, which might imply that this taxon was also  
521 a tool-user due to its robust shaft with marked muscular attachments but small  
522 epicondyles (Berger et al., 2015; Kivell et al., 2015a,b, Galletta et al., 2019). However,  
523 it is also worth considering that *H. naledi* shows an unusual MC1 morphology that

524 when interpreted in combination with what is known from this species finger anatomy,  
525 may indicate a distinctive behavioral repertoire that could have included tool use as  
526 well as significant amounts of climbing (Kivell et al. 2015b). Finally, *A. sediba*'s  
527 anatomical characteristics suggests incipient tool using capabilities due to its slender  
528 thumb, smaller radial and ulnar epicondyles and curved joint surfaces (Kivell et al.,  
529 2011; Skinner et al., 2015; Galleta et al., 2019). Nevertheless, it is important to keep  
530 in mind that the above interpretations are exclusively based on a morphometric  
531 assessment of the MC1's body anatomy (i.e., we did not directly assess any functional  
532 capabilities). Future studies should try not only to imply functional aspects based on  
533 morphological similarities but rather explicitly include them as part of the study (see  
534 e.g., Bucchi et al., 2020c).

535

536 From a functional perspective, the more robust MC1 shaft of humans (Fig. 2b) has  
537 been associated in previous studies with the ability of withstanding higher stresses  
538 placed upon the thumb by sustained power and precision grasping (e.g., Key &  
539 Dunmore, 2015; Marzke, Wullstein, & Viegas, 1992; Rolian, Lieberman, & Zermeno,  
540 2011). These robust thumbs have also been related to a greater development of the  
541 thenar musculature attached to the shaft that is highly active during hard hammer  
542 percussion and favors thumb opposition (Marzke, 2013; Marzke, Toth, Schick, &  
543 Reece, 1998). The pronounced radial and ulnar epicondyles found at the distal head  
544 of the human MC1 (as described by PC1) may help to reduce the range of motion and  
545 stabilize the MCPJ (Imaeda, An, & Cooney, 1992). These epicondyles act as anchor  
546 points for collateral ligaments, which insert at the base of the proximal phalanx. Larger  
547 epicondyles are therefore thought to act as stronger anchors by providing a greater  
548 area for the collateral ligaments to attach to, helping to stabilize the MCPJ during the

549 high forces that are experienced by the thumb during manipulation (Galletta et al.,  
550 2019). The flatter and larger distal articular surface in humans serves a similar purpose  
551 and has been interpreted as an adaptation that limits dorso-palmar motion whilst  
552 preventing radioulnar motion (Barmakian, 1992), thereby stabilizing the MC1 and  
553 facilitating forceful power and precision grasping.

554

### 555 4.3 Conclusion

556 The aim of this study was to quantify the morphology of the MC1 shaft in extant African  
557 hominoids, in order to better characterize its morphology. This characterization is not  
558 only relevant to better understand hominine anatomical differences and similarities,  
559 but also to provide further insights about its possible relationship with manipulative  
560 capabilities. This can facilitate more informed functional interpretation of fossil hominin  
561 morphology and contribute towards future studies linking morphology and function in  
562 hominin thumbs. Our study found that each taxon presented a unique repertoire of  
563 morphological traits, not present to the same extent in the others. Overall, the results  
564 obtained both aligned with and added to past functional interpretations of hominin  
565 morphology, thereby reinforcing the validity of 3DGM as a method of quantifying MC1  
566 morphology and providing a deeper insight into the anatomy of the thumb in both  
567 extant hominids and fossil hominins. In addition, fossil MC1s are frequently  
568 fragmentary, and their epiphyses are often damaged. Hence, our applied approach  
569 which exclusively focused on the MC1 shaft might be particularly helpful in  
570 paleoanthropological contexts.

571

### 572 **Acknowledgments**

573 We are grateful to the following curators and institutions: Emmanuel Gilissen  
574 (AfricaMuseum), Anneke H. van Heteren and Michael Hiermeier (Zoologische  
575 Staatssammlung München), Javier Quesada (Museu de Ciències Naturals de  
576 Barcelona), José Miguel Carretero (Universidad de Burgos). AB was partially funded  
577 by a Becas Chile scholarship, whilst TP was funded by the Leverhulme Trust Early  
578 Career Fellowship, ECF-2018-264. This study was funded by the research projects  
579 AGAUR 2017 SGR 1040 and MICINN-FEDER PGC2018-093925-B-C32. We are also  
580 grateful to the two anonymous reviewers, associate editor and editorial board member  
581 who helped us to improve our work.

582

### 583 **Author contributions**

584 Jonathan Morley: Data analysis; investigation; methodology; writing-original draft;  
585 writing-review and editing. Ana Bucchi: Conceptualization; methodology; resources;  
586 data curation; writing-review and editing. Carlos Lorenzo: Resources; data curation.  
587 Thomas A. Püschel: Conceptualization; data curation; data analysis; investigation;  
588 visualization; writing-review and editing; project administration.

589

### 590 **Data availability statement**

591 The data supporting the findings of this study are available in the supplementary  
592 material (S6) of this article.

593

### 594 **ORCID**

595 Ana Bucchi <https://orcid.org/0000-0002-1247-230X>

596 Carlos Lorenzo <https://orcid.org/0000-0001-5706-293X>

597 Thomas A. Püschel <https://orcid.org/0000-0002-2231-2297>



598

## 599 **References**

600 Adams, D. C., Collyer, M. L., & Kaliontzopoulou, A. (2020). Geomorph: Software for

601 geometric morphometric analysis. R package version 4.0.2.

602 Adler, D., & Kelly, S. T. (2020). vioplot: violin plot. R package version 0.3.5.

603

604 Almécija, S., Moyà-Solà, S., & Alba, D. M. (2010). Early origin for human-like

605 precision grasping: A comparative study of pollical distal phalanges in fossil

606 hominins. *PLOS ONE*, 5(7), e11727.

607 <https://doi.org/10.1371/journal.pone.0011727>

608 Almécija, S., Smaers, J. B., & Jungers, W. L. (2015). The evolution of human and

609 ape hand proportions. *Nature Communications*, 6, 1–11.

610 <https://doi.org/10.1038/ncomms8717>

611 Barmakian, J. T. (1992). Anatomy of the joints of the thumb. *Hand Clinics*, 8(4), 683–

612 691.

613 Berger, L. R., Ruiters, D. J. de, Churchill, S. E., Schmid, P., Carlson, K. J., Dirks, P.

614 H. G. M., & Kibii, J. M. (2010). Australopithecus sediba: A new species of

615 Homo-like Australopithecus from South Africa. *Science*, 328(5975), 195–204.

616 <https://doi.org/10.1126/science.1184944>

617 Bookstein, F. L. (1991). *Morphometric Tools for Landmark Data: Geometry and*

618 *Biology*. Cambridge: Cambridge University Press.

619 Bookstein, F. L. (1997). *Morphometric Tools for Landmark Data: Geometry and*

620 *Biology* (2<sup>nd</sup> edition). Cambridge: Cambridge University Press.

621 Bucchi, A., Luengo, J., Fuentes, R., Arellano-Villalón, M., Lorenzo, C. (2020a).

622 Recommendations for improving photo quality in close range

623 photogrammetry, exemplified in hand bones of chimpanzees and gorillas.

- 624 *International Journal of Morphology*, 38(2), 348–355.
- 625 <https://doi.org/10.4067/S0717-95022020000200348>
- 626
- 627 Bucchi, A., Luengo, J., Bove, A. D., & Lorenzo, C. (2020b). Insertion sites in manual
- 628 proximal phalanges of African apes and modern humans. *American Journal of*
- 629 *Physical Anthropology*, 1–12. <https://doi.org/10.1002/ajpa.24127>
- 630
- 631 Bucchi, A., Püschel, T. A., Lorenzo, C., & Marcé-Nogué, J. (2020c). Finite element
- 632 analysis of the proximal phalanx of the thumb in Hominoidea during simulated
- 633 stone tool use. *Comptes Rendus Palevol*, 19(2), 26–39.
- 634 Bush, M. E., Lovejoy, C. O., Johanson, D. C., & Coppens, Y. (1982). Hominid carpal,
- 635 metacarpal, and phalangeal bones recovered from the Hadar Formation:
- 636 1974–1977 collections. *American Journal of Physical Anthropology*, 57(4),
- 637 651–677.
- 638 Casillas Garcia, J. A., & Alvarez, G. A. (2005). La actuacion arqueologica en el
- 639 “Solar de Caballeria” y el convento de San Pablo de Burgos. *Ayuntamiento de*
- 640 *Burgos*.
- 641 Diogo, R., Pastor, J. F., Ferrero, E., Barbosa, M., Potau, J., de Paz, F., ... Wood, B.
- 642 (2011). *Photographic and Descriptive Musculoskeletal Atlas of Gorilla*. New
- 643 Hampshire: Science Publishers.
- 644 Diogo, R., Richmond, B. G., & Wood, B. (2012). Evolution and homologies of primate
- 645 and modern human hand and forearm muscles, with notes on thumb
- 646 movements and tool use. *Journal of Human Evolution*, 63(1), 64–78.
- 647 <https://doi.org/10.1016/j.jhevol.2012.04.001>

- 648 Diogo, R., Potau, J. M., Pastor, J. F., Paz, F. J. D., Ferrero, E. M., Bello, G., ...  
649 Wood, B. (2013). Photographic and Descriptive Musculoskeletal Atlas of  
650 Chimpanzees. New Hampshire: Science Publishers.
- 651 Dirks, P. H., Roberts, E. M., Hilbert-Wolf, H., Kramers, J. D., Hawks, J., Dosseto, A.,  
652 ... Berger, L. R. (2017). The age of homo naledi and associated sediments in  
653 the rising star cave, South Africa. *ELife*, 6. <https://doi.org/10.7554/eLife.24231>
- 654 Drake, A. G., & Klingenberg, C. P. (2010). Large-Scale diversification of skull shape  
655 in domestic dogs: Disparity and modularity. *The American Naturalist*, 175(3),  
656 289–301. <https://doi.org/10.1086/650372>
- 657 Dunmore, C. J., Bardo, A., Skinner, M. M., & Kivell, T. L. (2020). Trabecular variation  
658 in the first metacarpal and manipulation in hominids. *American Journal of*  
659 *Physical Anthropology*, 171(2), 219–241.
- 660 Feix, T., Kivell, T. L., Pouydebat, E., & Dollar, A. M. (2015). Estimating thumb-index  
661 finger precision grip and manipulation potential in extant and fossil primates.  
662 *Journal of the Royal Society, Interface / the Royal Society*, 12(106),  
663 20150176–. <https://doi.org/10.1098/rsif.2015.0176>
- 664 Galletta, L., Stephens, N. B., Bardo, A., Kivell, T. L., & Marchi, D. (2019). Three-  
665 dimensional geometric morphometric analysis of the first metacarpal distal  
666 articular surface in humans, great apes and fossil hominins. *Journal of Human*  
667 *Evolution*, 132, 119–136. <https://doi.org/10.1016/j.jhevol.2019.04.008>
- 668 Green, D. J., & Gordon, A. D. (2008). Metacarpal proportions in Australopithecus  
669 africanus. *Journal of Human Evolution*, 54(5), 705–719.  
670 <https://doi.org/10.1016/j.jhevol.2007.10.007>
- 671 Guérin, G., Frouin, M., Talamo, S., Aldeias, V., Bruxelles, L., Chiotti, L., ... Jain, M.  
672 (2015). A multi-method luminescence dating of the Palaeolithic sequence of

- 673 La Ferrassie based on new excavations adjacent to the La Ferrassie 1 and 2  
674 skeletons. *Journal of Archaeological Science*, 58, 147–166.
- 675 Gunz, P., & Mitteroecker, P. (2013). Semilandmarks: A method for quantifying  
676 curves and surfaces. *Hystrix, the Italian Journal of Mammalogy*, 24(1), 103–  
677 109.
- 678 Gunz, P., Mitteroecker, P., & Bookstein, F. L. (2005). Semilandmarks in three  
679 dimensions. In D. E. Slice (Ed.), *Modern Morphometrics in Physical*  
680 *Anthropology* (pp. 73–98). Boston, MA: Springer US.  
681 [https://doi.org/10.1007/0-387-27614-9\\_3](https://doi.org/10.1007/0-387-27614-9_3)
- 682 Imaeda, T., An, K. N., & Cooney 3rd, W. P. (1992). Functional anatomy and  
683 biomechanics of the thumb. *Hand Clinics*, 8(1), 9–15.
- 684 Karakostis, F. A., Hotz, G., Scherf, H., Wahl, J., & Harvati, K. (2017). Occupational  
685 manual activity is reflected on the patterns among hand entheses. *American*  
686 *Journal of Physical Anthropology*, 164(1), 30–40.  
687 <https://doi.org/10.1002/ajpa.23253>
- 688 Karakostis, F. A., Hotz, G., Tzouroukian, V., & Harvati, K. (2018). Evidence for  
689 precision grasping in Neandertal daily activities. *Science Advances*, 4(9),  
690 eaat2369. <https://doi.org/10.1126/sciadv.aat2369>
- 691 Key, A. J., & Dunmore, C. J. (2018). Manual restrictions on Palaeolithic technological  
692 behaviours. *PeerJ*, 6, e5399.
- 693 Key, A. J. M., & Dunmore, C. J. (2015). The evolution of the hominin thumb and the  
694 influence exerted by the non-dominant hand during stone tool production.  
695 *Journal of Human Evolution*, 78, 60–69.  
696 <https://doi.org/10.1016/j.jhevol.2014.08.006>

- 697 Kivell, T. L. (2015a). Evidence in Hand: recent discoveries and the early evolution of  
698 human manual manipulation. *Philosophical Transactions of the Royal Society*,  
699 Kivell, T. L., Deane, A. S., Tocheri, M. W., Orr, C. M., Schmid, P., Hawks, J., ...  
700 Churchill, S. E. (2015b). The hand of Homo naledi. *Nature Communications*,  
701 6, 8431.
- 702 Kivell, T. L., Kibii, J. M., Churchill, S. E., Schmid, P., & Berger, L. R. (2011).  
703 Australopithecus sediba hand demonstrates mosaic evolution of locomotor  
704 and manipulative abilities. *Science*, 333(6048), 1411–1417.  
705 <https://doi.org/10.1126/science.1202625>
- 706 Klingenberg, C. P., & McIntyre, G. S. (1998). Geometric morphometrics of  
707 developmental instability: Analyzing patterns of fluctuating asymmetry with  
708 Procrustes methods. *Evolution*, 52(5), 1363–1375.  
709 <https://doi.org/10.2307/2411306>
- 710 Kuhn, M., & Johnson, K. (2013). Measuring Performance in Classification Models. In  
711 *Applied Predictive Modeling* (pp. 247–273). Springer, New York, NY.  
712 [https://doi.org/10.1007/978-1-4614-6849-3\\_11](https://doi.org/10.1007/978-1-4614-6849-3_11)
- 713 Maki, J., & Trinkaus, E. (2011). Opponens pollicis mechanical effectiveness in  
714 Neandertals and early modern humans. *PaleoAnthropology*, 62–71.  
715 <https://doi.org/doi:10.4207/PA.2011.ART43>
- 716 Marchi, D., Proctor, D. J., Huston, E., Nicholas, C. L., & Fischer, F. (2017).  
717 Morphological correlates of the first metacarpal proximal articular surface with  
718 manipulative capabilities in apes, humans and South African early hominins.  
719 *Comptes Rendus Palevol*, 16(5), 645–654.  
720 <https://doi.org/10.1016/j.crpv.2016.09.002>

- 721 Marzke, M. W. (2013). Tool making, hand morphology and fossil hominins.  
722 *Philosophical Transactions of the Royal Society B: Biological Sciences*,  
723 368(1630), 20120414. <https://doi.org/10.1098/rstb.2012.0414>
- 724 Marzke, M. W., Tocheri, M. W., Steinberg, B., Femiani, J. D., Reece, S. P.,  
725 Linscheid, R. L., ... Marzke, R. F. (2010). Comparative 3D quantitative  
726 analyses of trapeziometacarpal joint surface curvatures among living  
727 catarrhines and fossil hominins. *American Journal of Physical Anthropology*,  
728 141(1), 38–51. <https://doi.org/10.1002/ajpa.21112>
- 729 Marzke, Mary W, Toth, N., Schick, K., & Reece, S. (1998). EMG study of hand  
730 muscle recruitment during hard hammer percussion manufacture of Oldowan  
731 tools. *American Journal of Physical Anthropology* 105(3), 315–332.
- 732 Matarazzo, S. A. (2015). Trabecular architecture of the manual elements reflects  
733 locomotor patterns in primates. *PLoS ONE*, 10(3), e0120436.  
734 <https://doi.org/10.1371/journal.pone.0120436>
- 735 McClure, N., Phillips, A., Vogel ER, Tocheri, M. (2012). Unexpected pollex and  
736 hallux use in wild Pongo pygmaeus wurmbii. *American Journal of Physical*  
737 *Anthropology*, 147(S54): S208.
- 738 Menger, K. (1930). Untersuchungen über allgemeine Metrik. Vierte Untersuchung.  
739 Zur Metrik der Kurven. *Mathematische Annalen*, 103, 466–501.
- 740 Niewoehner, W. A. (2001). Behavioral inferences from the Skhul/Qafzeh early  
741 modern human hand remains. *Proceedings of the National Academy of*  
742 *Sciences*, 98(6), 2979–2984. <https://doi.org/10.1073/pnas.041588898>
- 743 Niewoehner, W. A. (2006). Neanderthal hands in their proper perspective. In  
744 *Neanderthals revisited: New approaches and perspectives* (pp. 157–190).  
745 Springer.

- 746 Oksanen, J., Guillaume Blanchet, F., Friendly, M., Kindt, R., Legendre, P., McGlinn,  
747 D., Minchin, P. R., O'Hara, R. B., Simpson, G. L., Solymos, P., Henry, M.,  
748 Stevens, H., Szoecs, E., & Wagner, H. (2020). *vegan:Community Ecology*  
749 *Package*. R package version 2.5-7.
- 750  
751 Perez, S. I., Bernal, V., & Gonzalez, P. N. (2006). Differences between sliding semi-  
752 landmark methods in geometric morphometrics, with an application to human  
753 craniofacial and dental variation. *Journal of Anatomy*, 208(6), 769–784.  
754 <https://doi.org/10.1111/j.1469-7580.2006.00576.x>
- 755 Pickering, R., Dirks, P. H. G. M., Jinnah, Z., Ruiter, D. J. de, Churchill, S. E., Herries,  
756 A. I. R., ... Berger, L. R. (2011). *Australopithecus sediba* at 1.977 Ma and  
757 Implications for the Origins of the Genus *Homo*. *Science*, 333(6048), 1421–  
758 1423. <https://doi.org/10.1126/science.1203697>
- 759 Püschel, T. A., Marcé-Nogué, J., Chamberlain, A. T., Yoxall, A., & Sellers, W. I.  
760 (2020). The biomechanical importance of the scaphoid-centrale fusion during  
761 simulated knuckle-walking and its implications for human locomotor evolution.  
762 *Scientific Reports*, 10(1), 1–7. <https://doi.org/10.1038/s41598-020-60590-6>
- 763 Püschel, T. A., Marcé-Nogué, J., Gladman, J., Patel, B. A., Almécija, S., & Sellers,  
764 W. I. (2020). Getting its feet on the ground: Elucidating *Paralouatta*'s semi-  
765 terrestriality using the virtual morpho-functional toolbox. *Frontiers in Earth*  
766 *Science*, 8. <https://doi.org/10.3389/feart.2020.00079>
- 767 Püschel, T. A., Marcé-Nogué, J., Gladman, J. T., Bobe, R., & Sellers, W. I. (2018).  
768 Inferring locomotor behaviours in Miocene New World monkeys using finite  
769 element analysis, geometric morphometrics and machine-learning  
770 classification techniques applied to talar morphology. *Journal of The Royal*  
771 *Society Interface*, 15(146), 20180520. <https://doi.org/10.1098/rsif.2018.0520>

- 772 Rein, T. R. (2011). The correspondence between proximal phalanx morphology and  
773 locomotion: Implications for inferring the locomotor behavior of fossil  
774 catarrhines. *American Journal of Physical Anthropology*, 146(3), 435–445.  
775 <https://doi.org/10.1002/ajpa.21599>
- 776 Richmond, B. G., Green, D. J., Lague, M. R., Chirchir, H., Behrensmeyer, A. K.,  
777 Bobe, R., ... Braun, D. R. (2020). The upper limb of *Paranthropus boisei* from  
778 Ileret, Kenya. *Journal of Human Evolution*, 141, 102727.  
779 <https://doi.org/10.1016/j.jhevol.2019.102727>
- 780 Richmond, Brian G., & Strait, D. S. (2000). Evidence that humans evolved from a  
781 knuckle-walking ancestor. *Nature*, 404(6776), 382.
- 782 Rolian, C., & Gordon, A. D. (2013). Reassessing manual proportions in  
783 *Australopithecus afarensis*. *American Journal of Physical Anthropology*,  
784 152(3), 393–406. <https://doi.org/10.1002/ajpa.22365>
- 785 Rolian, C., Lieberman, D. E., & Zermeno, J. P. (2011). Hand biomechanics during  
786 simulated stone tool use. *Journal of Human Evolution*, 61(1), 26–41.  
787 <https://doi.org/10.1016/j.jhevol.2011.01.008>
- 788 Stephens, N. B., Kivell, T. L., Gross, T., Pahr, D. H., Lazenby, R. A., Hublin, J. J., ...  
789 Skinner, M. M. (2016). Trabecular architecture in the thumb of *Pan* and *Homo*:  
790 implications for investigating hand use, loading, and hand preference in the  
791 fossil record. *American Journal of Physical Anthropology*, 161(4), 603–619.  
792 <https://doi.org/10.1002/ajpa.23061>
- 793 Stern, J. T., Jungers, W. L., & Susman, R. L. (1995). Quantifying phalangeal  
794 curvature: an empirical comparison of alternative methods. *American Journal*  
795 *of Physical Anthropology*, 97(1), 1–10.



- 796 Susman, R. (1994). Fossil evidence for early hominid tool use. *Science*, 265(5178),  
797 1570–1573. <https://doi.org/10.1126/science.8079169>
- 798 Susman, R. L. (1979). Comparative and functional morphology of hominoid fingers.  
799 *American Journal of Physical Anthropology*, 50(2), 215–236.
- 800 Tocheri, M. W., Orr, C. M., Jacofsky, M. C., & Marzke, M. W. (2008). The  
801 evolutionary history of the hominin hand since the last common ancestor of  
802 Pan and Homo. *Journal of Anatomy*, 212(4), 544–562.  
803 <https://doi.org/10.1111/j.1469-7580.2008.00865.x>
- 804 Trinkaus E. (1983). *The Shanidar Neandertals*. Academic Press, New York
- 805 Trinkaus, E. (2016). The Evolution of the Hand in Pleistocene Homo. In T. L. Kivell,  
806 P. Lemelin, B. G. Richmond, & D. Schmitt (Eds.), *The Evolution of the Primate*  
807 *Hand* (pp. 545–571). New York, NY: Springer New York.  
808 [https://doi.org/10.1007/978-1-4939-3646-5\\_19](https://doi.org/10.1007/978-1-4939-3646-5_19)
- 809 Trinkaus, E., & Villedieu, I. (1991). Mechanical advantages of the Neandertal thumb  
810 in flexion: A test of an hypothesis. *American Journal of Physical Anthropology*,  
811 84(3), 249–260. <https://doi.org/10.1002/ajpa.1330840303>
- 812 Trinkaus E, Haduch E, Valde-Nowak PW, Wojtal P (2014) The Obłazowa 1 early  
813 modern human pollical phalanx and Late Pleistocene distal thumb  
814 proportions. *Homo* 65, 1–12.
- 815 Tsegai, Z. J., Kivell, T. L., Gross, T., Nguyen, N. H., Pahr, D. H., Smaers, J. B., &  
816 Skinner, M. M. (2013). Trabecular bone structure correlates with hand posture  
817 and use in hominoids. *PLoS One*, 8(11), e78781.
- 818 Tuttle, R. H. (1969). Quantitative and functional studies on the hands of the  
819 Anthropeida. I. The Hominoidea. *Journal of Morphology*, 128(3), 309–363.

- 820 Venables, W. N., & Ripley, B. D. (2002). *Modern Applied Statistics with S* (4th ed.).  
821 New York: Springer-Verlag.
- 822 Watanabe, A. (2017). LaMBDA: LandMark-Based Data Assessment. R package  
823 version 0.1.0.9000.
- 824 Wiley, D. F., Amenta, N., Alcantara, D. A., Ghost, D., Kil, Y. J., Delson, E., ...  
825 Hamann, B. (2005). Evolutionary morphing. *EEE Visualization, 2005. VIS 05*.
- 826 Zelditch, M. L., Swiderski, D. L., & Sheets, H. D. (2012a). *Geometric Morphometrics*  
827 *for Biologists: A Primer* (2 edition). Amsterdam: Academic Press.
- 828 Zelditch, M. L., Swiderski, D. L., & Sheets, H. D. (2012b). Chapter 9 - General Linear  
829 Models. In *Geometric Morphometrics for Biologists* (2 edition, pp. 209–228).  
830 San Diego: Academic Press.

831  
832

### 833 **Figure legends**

834

835 Figure 1. Illustration of the 16 landmarks (yellow spheres) and 144 semi-landmarks  
836 (red spheres) used in this study. The numbers of the 16 fixed landmarks and eight  
837 semi-landmark curves (C1-C8) are also plotted.

838

839 Figure 2. Principal component analysis of the shape data: the a) three main axes of  
840 morphological variation are displayed (ellipses represent 95% confidence intervals,  
841 red spheres: fossils, orange spheres: *H. sapiens*, green spheres: *P. troglodytes*;  
842 golden spheres: *G. gorilla*, golden cubes: *G. beringei*); Violin plots of the PCs scores  
843 of the analyzed sample are shown for b) PC1, c) PC2 and d) PC3 (fossil values are  
844 displayed as red triangles). The white dot in the middle is the median value, whilst the  
845 thick black bar in the center represents the interquartile range. The thin black line

846 extended from it corresponds to the upper (maximum) and lower (minimum) adjacent  
847 values in the data. The distribution shape of the data for each one of the three PCs is  
848 represented by a kernel density plots that were rotated and placed on each side of  
849 each one of the boxplots. To visualize shape differences warped models representing  
850 the shape changes along the first three principal components (PCs) were plotted  
851 alongside the violin plots (dorsal views). The models closest to the mean shape was  
852 to match the multivariate mean using the thin plate spline method. Then, the obtained  
853 average model was warped to display the variation along the three plotted PC axes  
854 (mag = 1).

855

856 Figure 3. Warped models representing the shape changes along the first three  
857 principal components (PCs). The models closest to the mean shape was to match the  
858 multivariate mean using the thin plate spline method. Then, the obtained average  
859 model was warped to display the variation along the three plotted PC axes (mag = 1).  
860 Corresponding anatomical descriptions are provided alongside each one the warped  
861 models. Please notice that articular surfaces were not morphometrically characterized  
862 and as such, none of the anatomical descriptions refer to them. References to  
863 curvature on this figure are based on the results provided in Table 5.

864

865 Figure 4. Multi-group linear discriminant analysis (LDA) of MC1's shape using extant  
866 genera categories. One of the models closest to the mean shape was warped to match  
867 the multivariate mean using the thin plate spline method, then the obtained average  
868 model was warped to represent the variation along the two plotted CV axes.

869

### Anterior

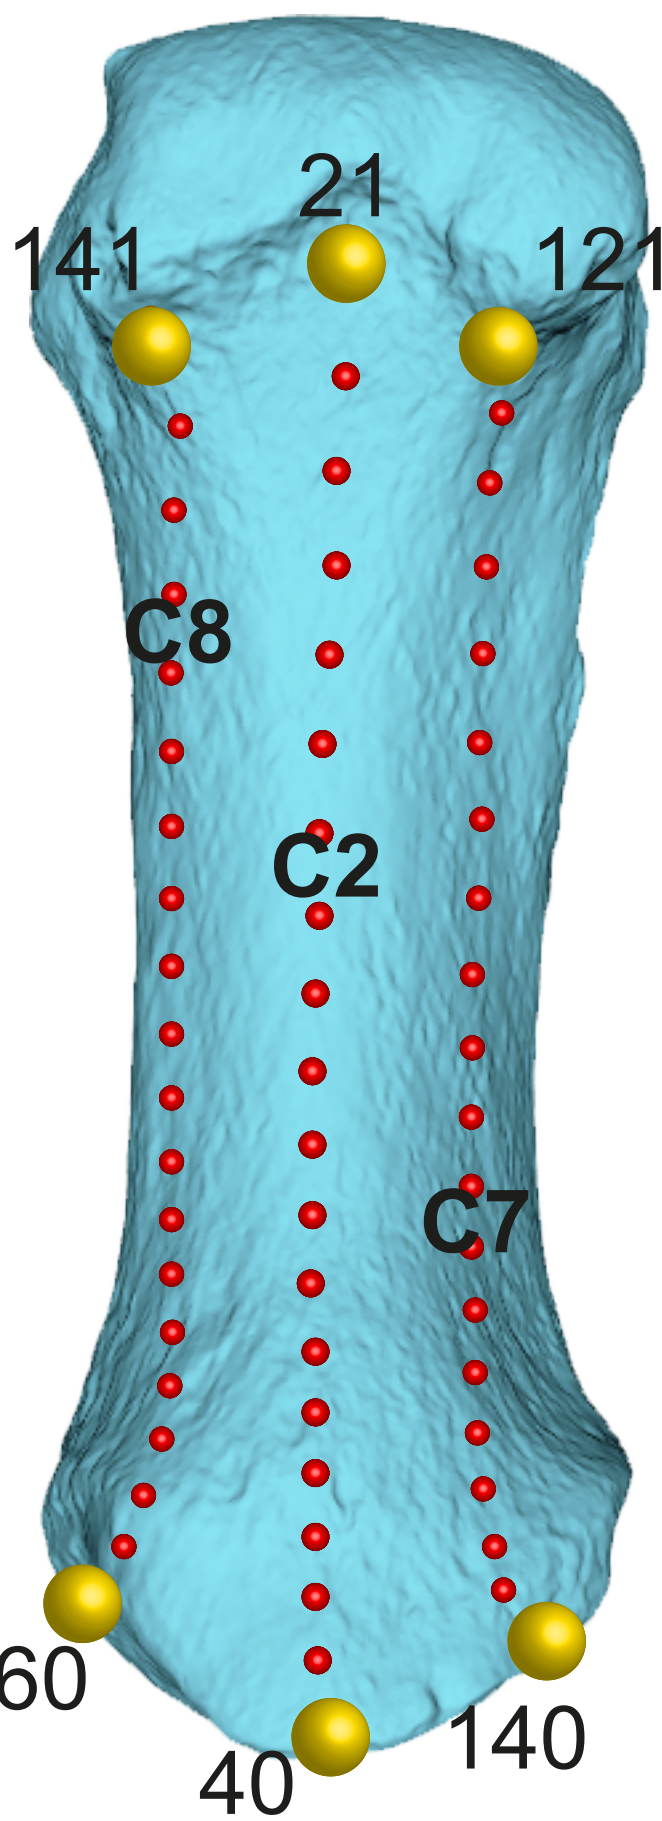

### Posterior

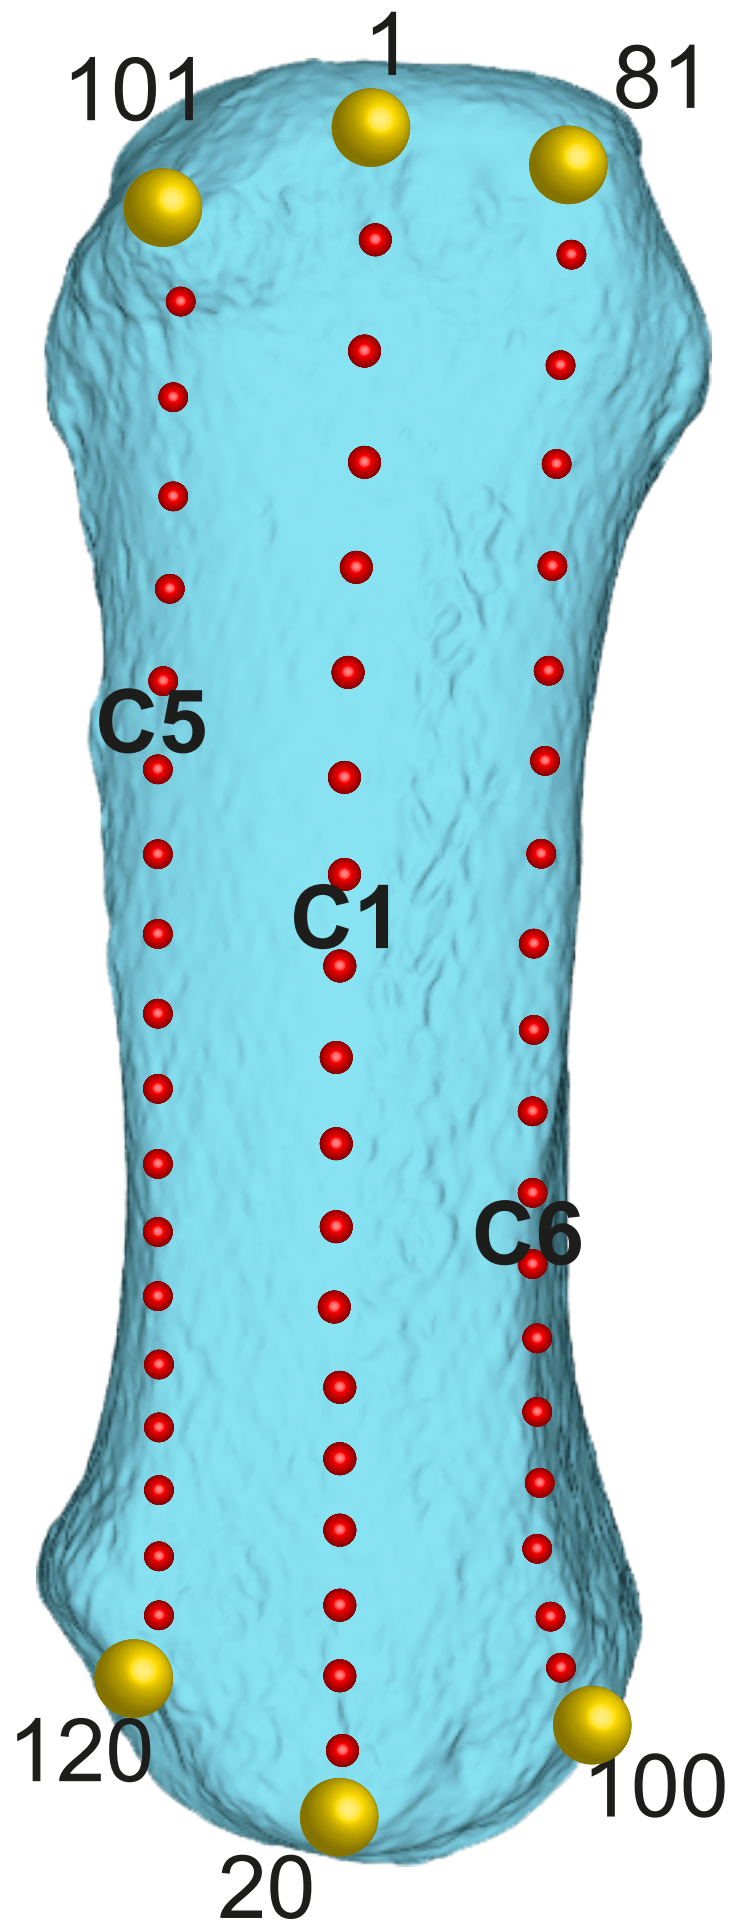

### Medial

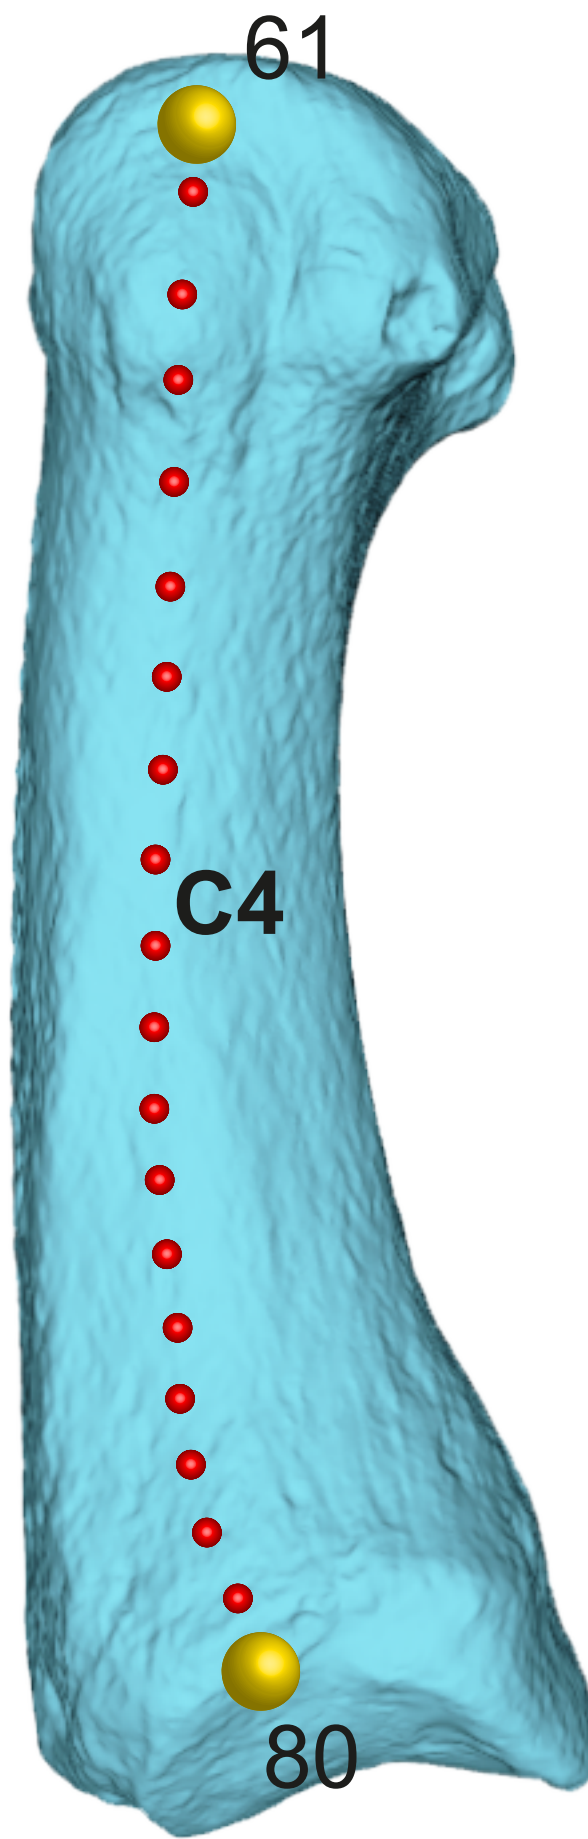

### Lateral

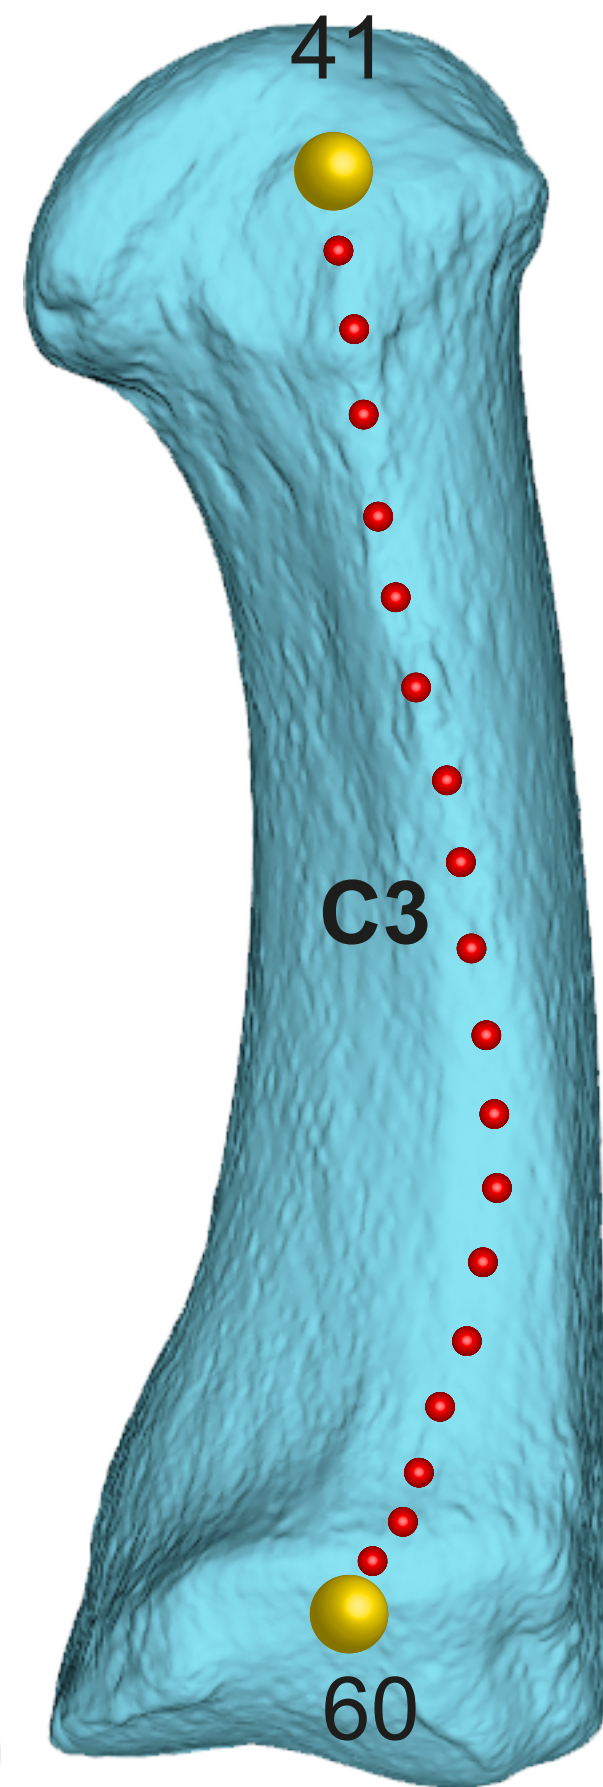

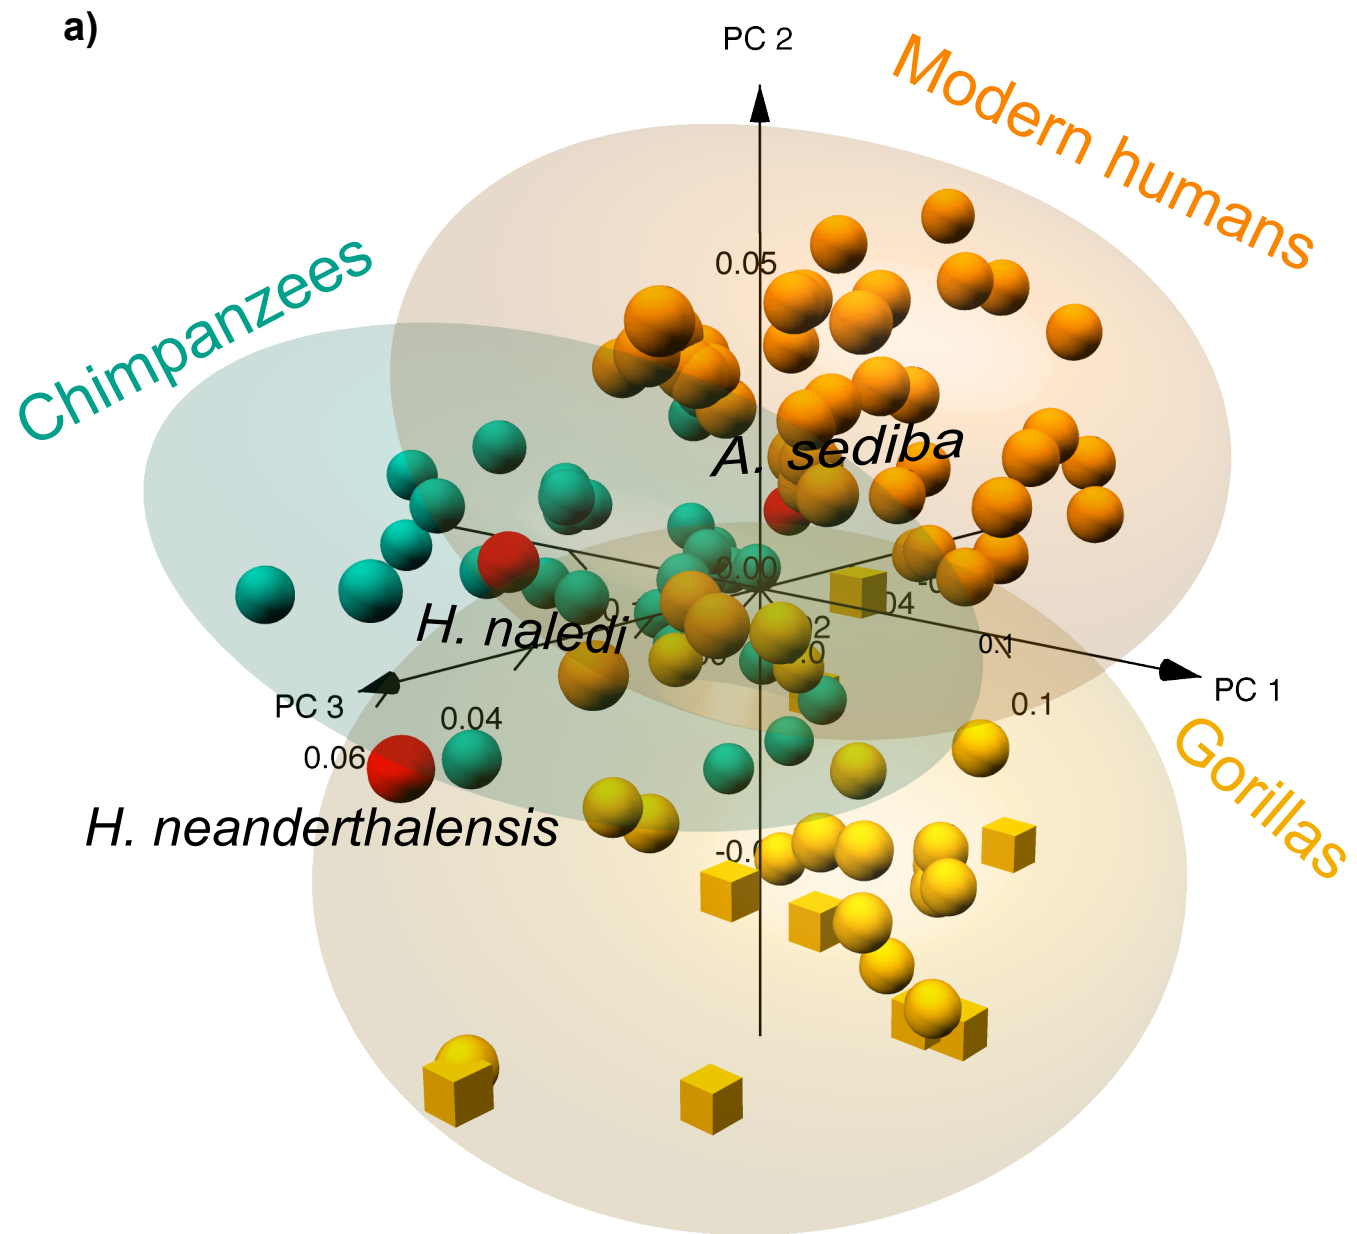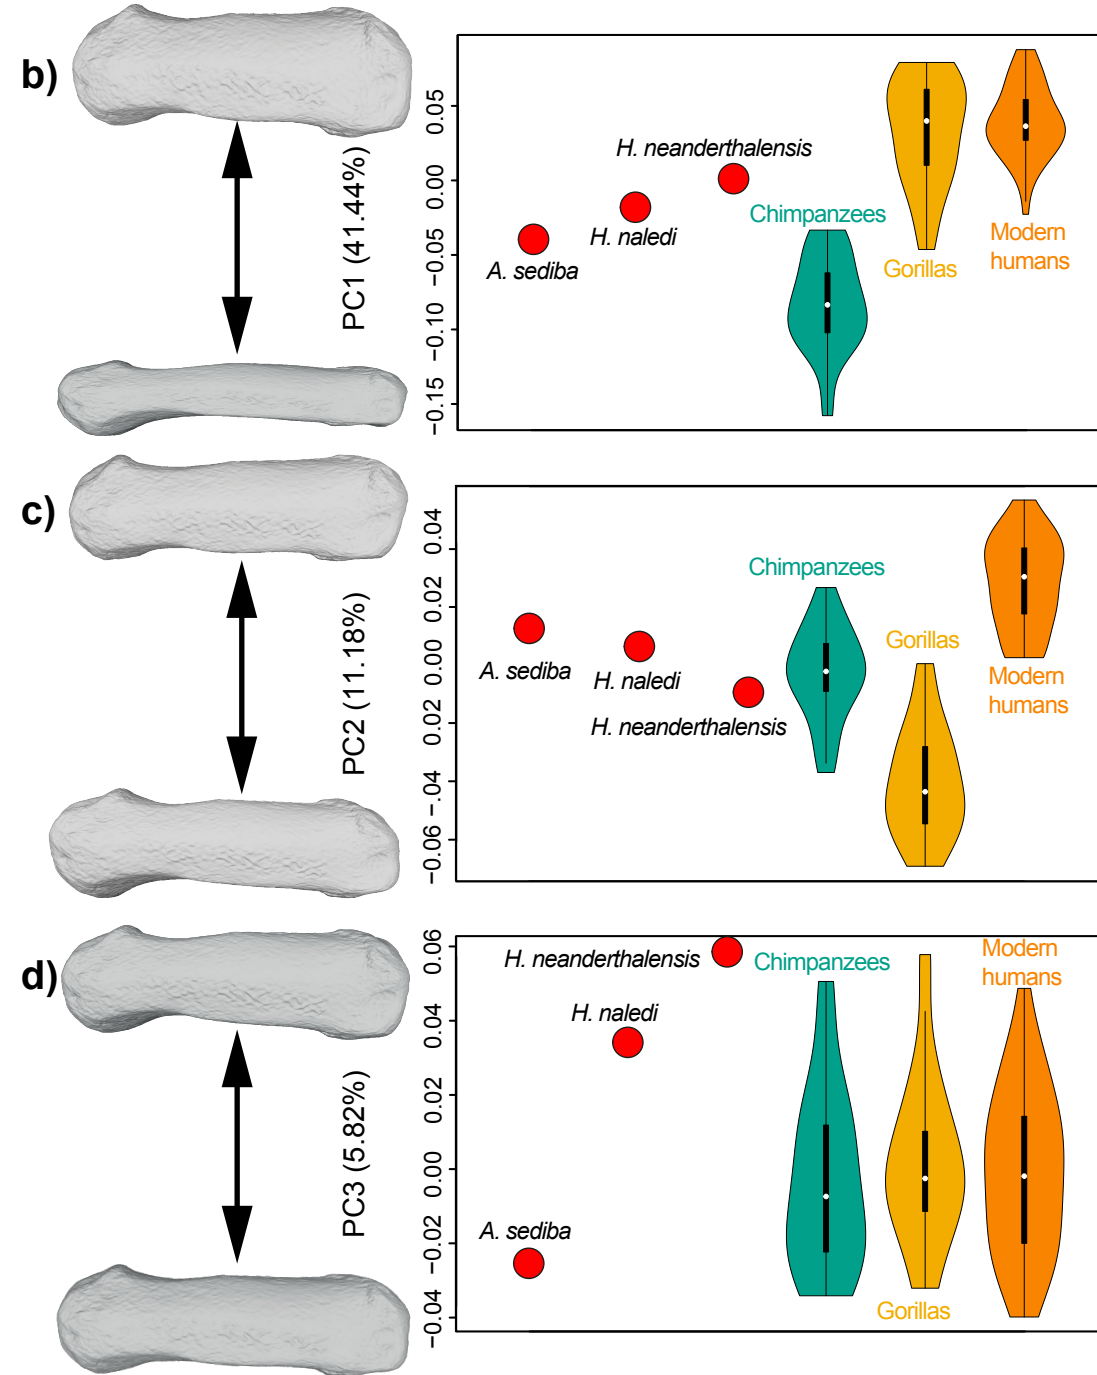

*Lateral* *Anterior* *Medial* *Posterior*

*Lateral* *Anterior* *Medial* *Posterior*

- Slender and gracile shaft
- Marked antero-posterior curvature of the shaft on the palmar side
- Narrower distal-most and proximal-most portions of the shaft
- Reduced radial and ulnar epicondyles

PC1 (-)

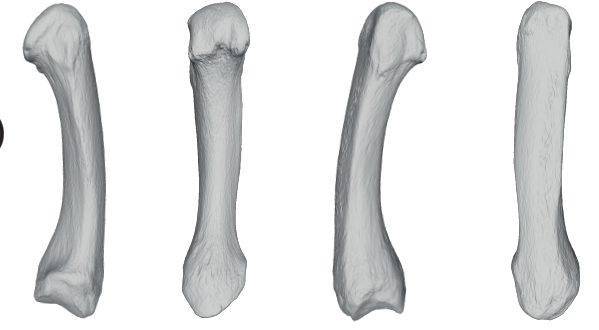

41.44%

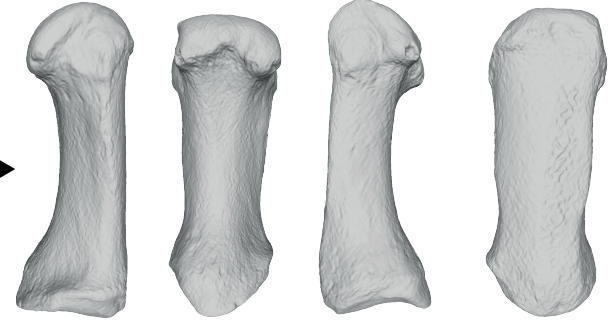

PC1 (+)

- Robust and broader shaft
- Straight dorsal aspect of the body
- Broader distal-most and proximal-most portions of the shaft
- Expanded ulnar and radial epicondyles

- Extended proximal palmar lip
- More curved shaft on both palmar and dorsal sides with radioulnar and dorsovolar rounded ends
- Medial epicondyle more distal relative to the lateral epicondyle
- Wider proximal-most portion of the shaft

PC2 (-)

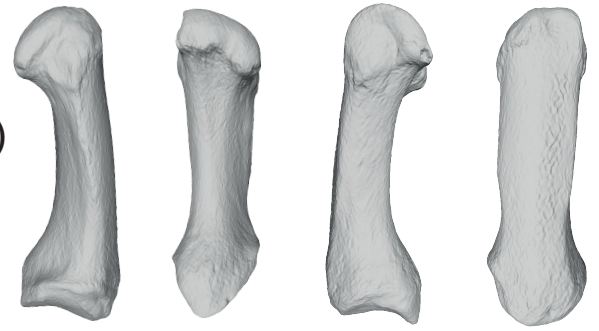

11.18%

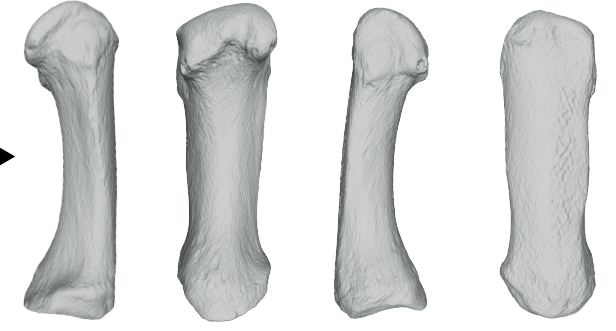

PC2 (+)

- Flatter distal-most and proximal-most portions of the shaft
- Expanded area at the place of origin of the radio-palmar condyles at the distal end
- Proximal-most and distal-most portions of the shaft show similar relative widths
- Medial epicondyle more proximal relative to the proximal epicondyle

- More curved palmar appearance of the shaft
- Proximally displaced epicondyles
- More gracile overall morphology

PC3 (-)

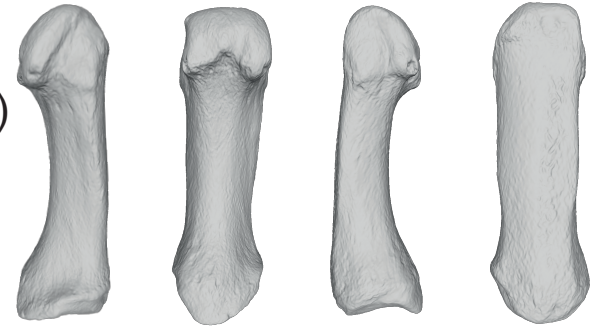

5.82%

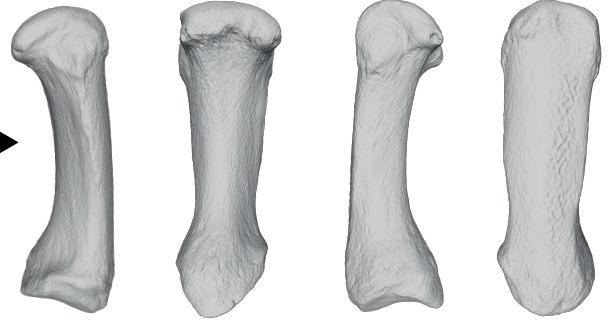

PC3 (+)

- Lateral flange for the opponens pollicis
- Waisted palmar and dorsal appearance
- Distally displaced epicondyles
- Broader distal-most portion of the shaft

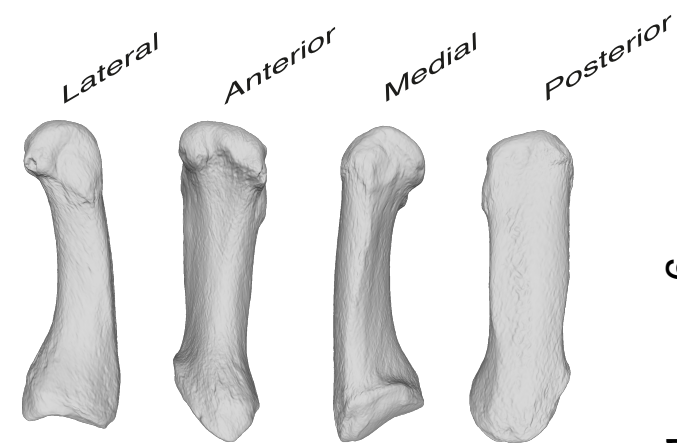

LD2 (23.6%)

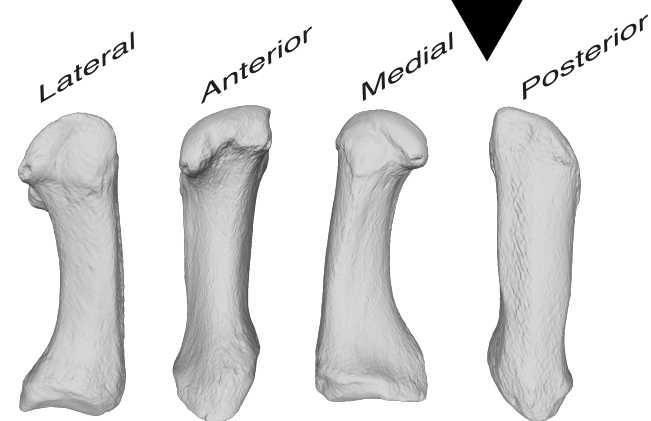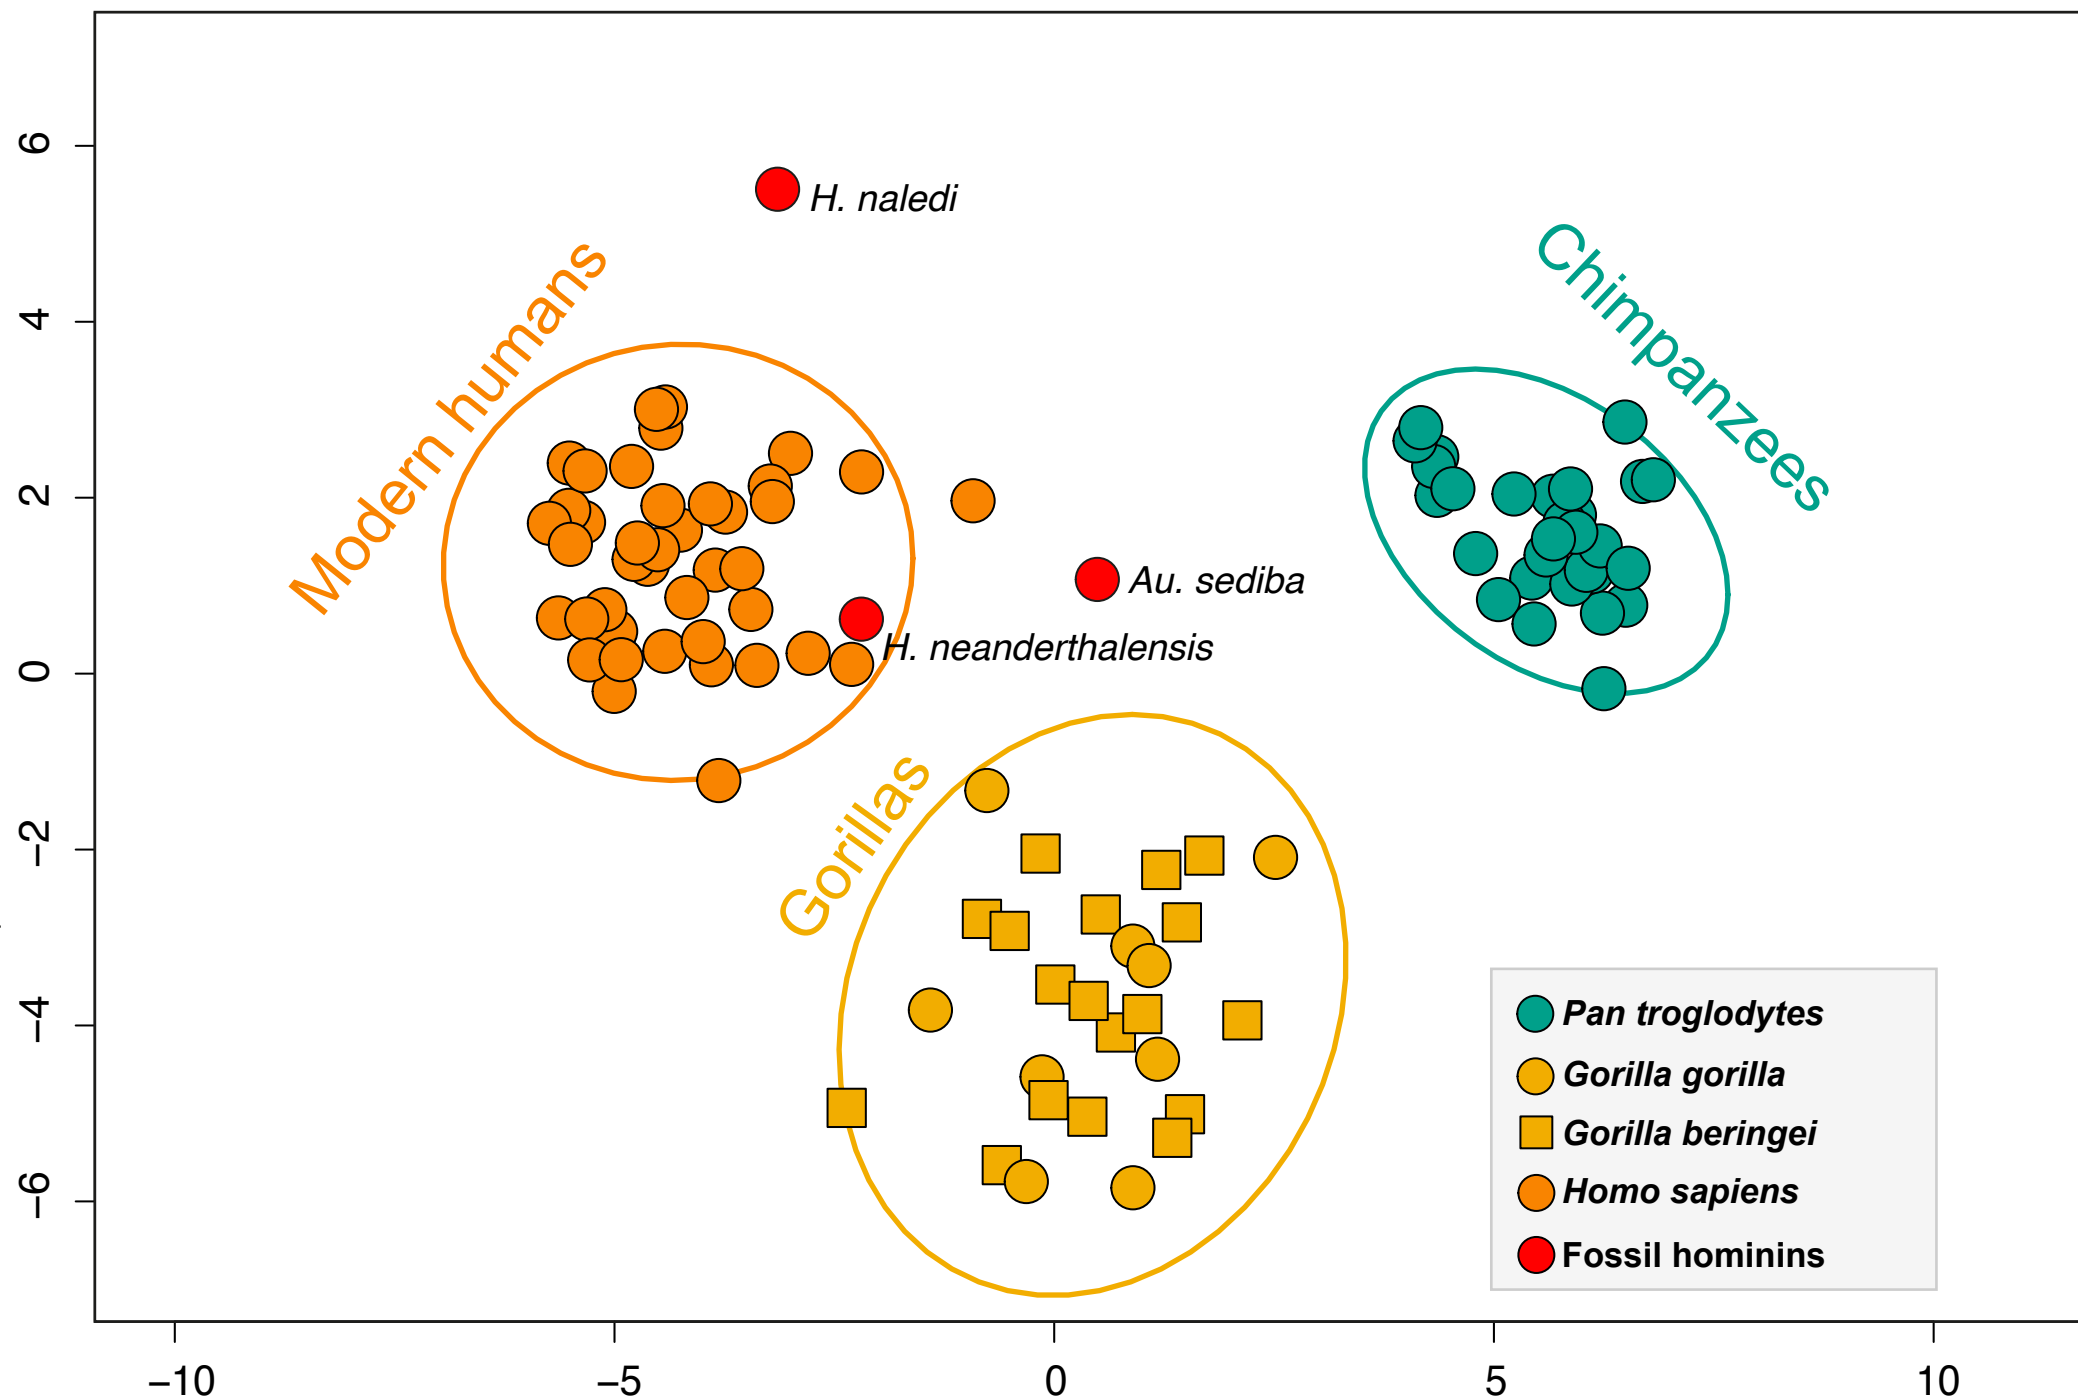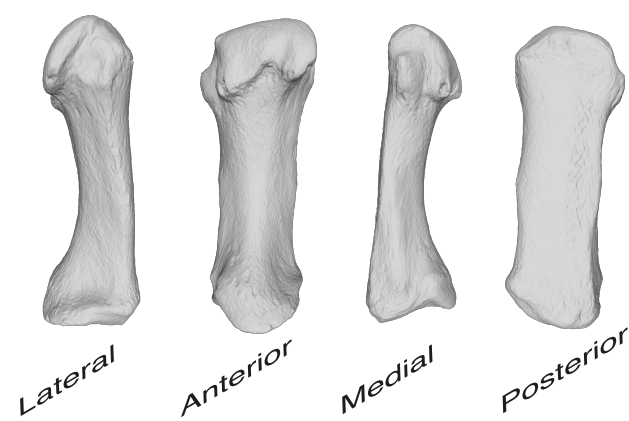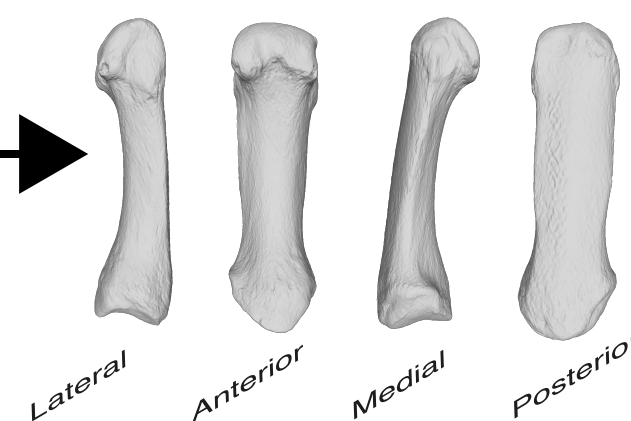

Source: https://www.biorxiv.org/content/10.1101/2020.04.30.070326v2.full.pdf
